# Supplementary material for: Contributions from the silent majority dominate dengue virus transmission
Source: PubMed Central journal article supplement (PMC5933708; doi:10.1371/journal.ppat.1006965), 2018-05-03
Supplement: ppat.1006965.s002.pdf [file ppat.1006965.s002.pdf]

1 **Text S2. Assessment of infectiousness data.**

2 **Generalizability across infectiousness data sets**

3 To explore the generalizability of the results as presented in Fig 2, we fit the logistic  
4 model defined in equation (3) of the main text separately to data from direct feeding  
5 experiments on people with symptomatic infections reported from three different studies  
6 [1-3] (see [osf.io/pjbhz](https://osf.io/pjbhz) for data and code). In addition, we fit the logistic model to data  
7 from these three studies combined (Figure S2.1). The best-fit curves associated with the  
8 three data sets were significantly different from another (likelihood ratio test:  $df = 4$ ,  $p$ -  
9 value =  $1.19e-23$ ). Pairwise comparisons between the data sets confirmed significant  
10 differences between any two dose-response curves, even though the fits to the Duong et  
11 al. data set and the Nguyen et al. data set are qualitatively similar (Figure S2.1) ( $p$ -values  
12 Duong vs Ferguson:  $8.8e-6$ , Duong vs Nguyen:  $7.5e-19$ , and Ferguson vs Nguyen:  $8.9e$ -  
13 12).

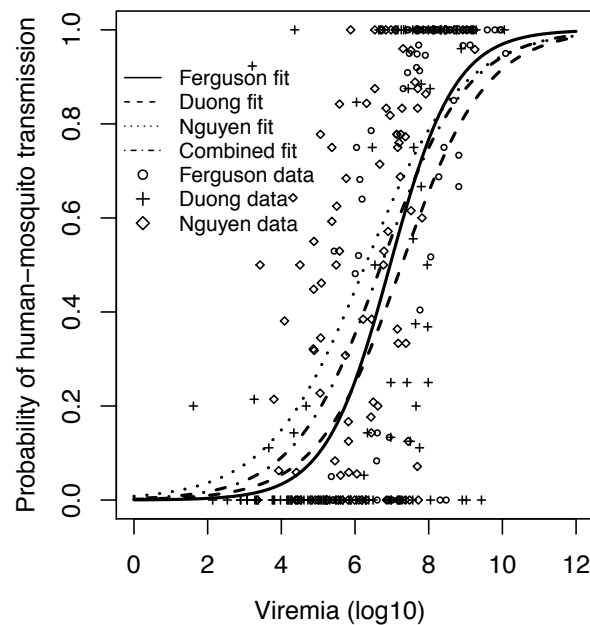

14

15 **Fig S2.1.** Logistic curves fitted to data sets on direct feeding on symptomatic DENV-  
 16 infected individuals.

17 **Table S2.1.** Dose-response curves for three datasets with distinct functional forms.

| Data set               | Function<br>al form | $\beta_0$ (95% CI)       | p                     | $\beta_1$ (95% CI) | p | LL   | AIC         | dAIC |
|------------------------|---------------------|--------------------------|-----------------------|--------------------|---|------|-------------|------|
| <b>Duong et al.</b>    | Logistic            | -6.37 (-7.12, -5.62)     | 0                     | 0.88 (0.77, 0.98)  | 0 | 927  | <b>931</b>  | 0    |
|                        | Hill                | 264.61 (158.68, 370.54)  | $9.78 \times 10^{-4}$ | 2.79 (2.58, 3.01)  | 0 | 1031 | 1036        | 105  |
|                        | Ferguson            | 7.95 (7.74, 8.15)        | 0                     | 4.07 (3.58, 4.56)  | 0 | 954  | 959         | 28   |
| <b>Ferguson et al.</b> | Logistic            | -7.91 (-8.82, -6.98)     | 0                     | 1.14 (1.01, 1.26)  | 0 | 1043 | 1047        | 6    |
|                        | Hill                | 763.22 (423.60, 1102.85) | $1.06 \times 10^{-5}$ | 3.66 (3.44, 3.89)  | 0 | 1178 | 1183        | 142  |
|                        | Ferguson            | 7.50 (7.39, 7.61)        | 0                     | 5.17 (4.63, 5.71)  | 0 | 1037 | <b>1041</b> | 0    |
| <b>Nguyen et al.</b>   | Logistic            | -4.79 (-5.40, -4.19)     | 0                     | 0.76 (0.67, 0.86)  | 0 | 933  | <b>937</b>  | 0    |
|                        | Hill                | 495.56 (143.97, 847.15)  | $5.75 \times 10^{-3}$ | 3.42 (3.03, 3.81)  | 0 | 969  | 973         | 46   |
|                        | Ferguson            | 6.97 (6.82, 7.13)        | 0                     | 3.44 (3.02, 3.86)  | 0 | 933  | <b>937</b>  | 0    |

18

19 **Assessment of functional forms**

20 To explore the appropriateness of a logistic model to describe the dose-response curves,  
 21 we fitted three different functional forms to the data sets: the logistic model (eqn. 2 in  
 22 main text), the Hill function,  $F(V) = V^{\beta_0} / \beta_1 + V^{\beta_0}$ , and the model used by [2], which  
 23 we will refer to as the Ferguson model,  $F(V) = 1 - \exp\left(\frac{-V}{\beta_0} + V\right)^{\beta_1}$ . Goodness of fit of  
 24 each model variant was assessed using AIC (Table S2.1). The data from [1] were best  
 25 described by the logistic model, whereas the data from [2] and [3] were described equally  
 26 well by the logistic model and the Ferguson model. Model fits between the logistic model  
 27 and the Ferguson model are not qualitatively different (Fig S2.2) and have differences in  
 28 AIC values of 0 and 6 in two cases. A difference of 5 is frequently interpreted as lack of a  
 29 significant difference in model fit [4].

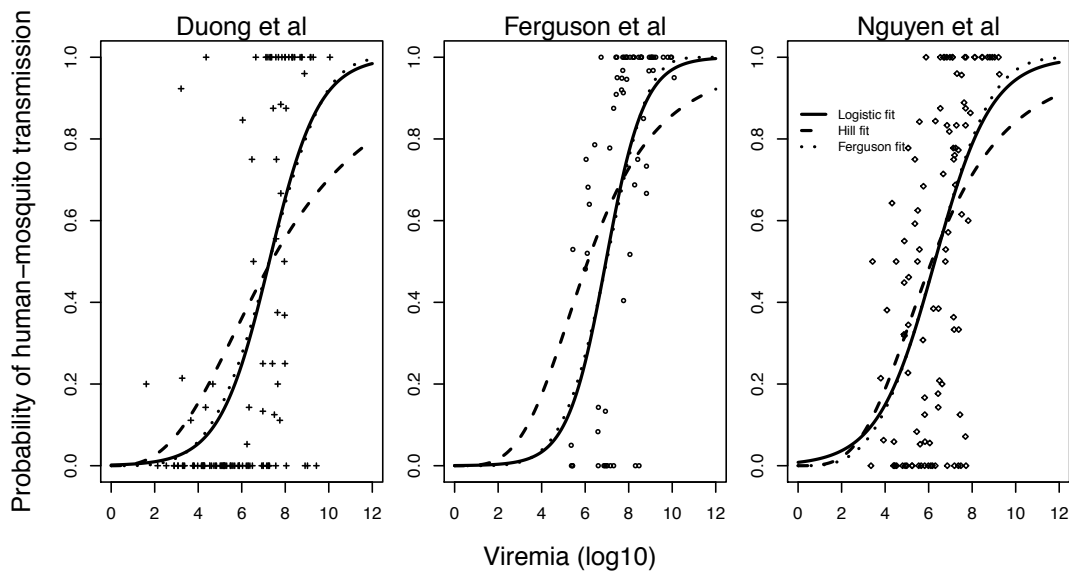

30

31 **Fig S2.2.** Comparison between three different functional forms fitted to data sets from  
 32 three different studies.

33 **Differences in infectiousness across serotypes**

34 Both [2] and [3] reported significantly different dose-response relationships among  
 35 serotypes in symptomatic individuals. To assess the extent to which this difference can be  
 36 explained by infection class, we re-evaluated the difference in dose-response curves  
 37 between serotypes both for the symptomatic subset and for the full dataset from [1] using  
 38 logistic regression. Fitting the logistic model to the symptomatic subset supports the  
 39 findings of the other studies that the dose-response curves vary significantly across  
 40 serotypes. Specifically, DENV-1 was associated with a curve significantly different from  
 41 that of DENV-2 ( $p = 0.005$ ), whereas DENV-4 was not ( $p = 0.44$ ). Notably, results about  
 42 which serotype exhibits the most efficient infectiousness to mosquitoes are mostly  
 43 consistent across studies, with DENV-1 transmitting most and DENV-3 least efficiently  
 44 (Fig S2.3 and Table S2.4).

45

46 The effect of the different serotypes on dose-response curves changes when assessing the  
47 full Duong et al. data set and accounting for infection class. As described by Duong et al.,  
48 the minimal adequate model does not include serotypes (Table 3) (serotype dropped from  
49 model based on likelihood ratio test,  $p = 0.54$ ). There was a significant effect of serotype  
50 in the indirect-feeding cohort, indicating that there may have been differences between  
51 the cohorts of individuals based around each feeding method.

52 **Table S2.3.** Minimal adequate model logistic regression on Duong et al. data set

| Factor                           | Coefficient | SE   | p       |
|----------------------------------|-------------|------|---------|
| Intercept                        | -6.36       | 0.33 | <2e-16  |
| Log <sub>10</sub> (viremia)      | 0.82        | 0.05 | <2e-16  |
| Infection class (asymptomatic)   | 1.43        | 0.35 | 3.75e-5 |
| Infection class (presymptomatic) | 1.63        | 0.17 | <2e-16  |
| Sex                              | 0.66        | 0.13 | 3.56e-7 |

53

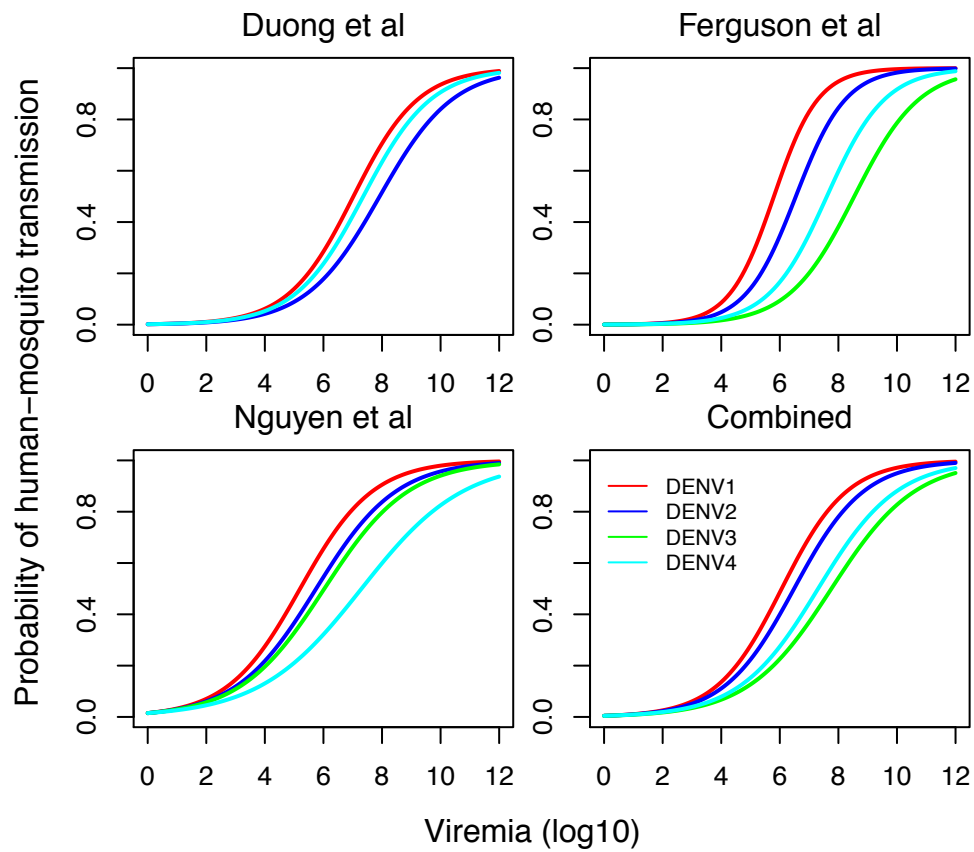

54

55 **Fig S2.3.** Comparative analysis of serotype-specific model fits to three different data sets  
 56 on symptomatic cases only (logistic model).

57

58 **Table S2.4.** Ranking of most infectious serotypes by study, in decreasing order of  
 59 infectiousness to mosquitoes per viremic particle in plasma.

| <b>Data set</b>       | <b>Rank 1</b> | <b>Rank 2</b> | <b>Rank 3</b> | <b>Rank 4</b> |
|-----------------------|---------------|---------------|---------------|---------------|
| <b>Duong et al</b>    | DENV 1        | DENV 4        | DENV 2        | NA            |
| <b>Ferguson et al</b> | DENV 1        | DENV 2        | DENV 4        | DENV 3        |
| <b>Nguyen et al</b>   | DENV 1        | DENV 2        | DENV 3        | DENV 4        |
| <b>Combined</b>       | DENV 1        | DENV 2        | DENV 4        | DENV 3        |

60

61 **The role of overdispersal**

62 We explored whether the infection data were over-dispersed using beta-binomial logistic  
 63 regression, which effectively allows for heterogeneity in dose-response relationships  
 64 among individuals from which the data points were derived. Based on AIC of models  
 65 with or without overdispersal (including viremia and infection class), we found no  
 66 support for accounting for overdispersal in the model (AIC for binomial model: 135; AIC  
 67 for beta-binomial model: 139). As to be expected, accounting for overdispersal resulted  
 68 in wider confidence intervals (Fig S2.4).

69

70 **Table S2.5.** Minimal adequate model logistic regression on Duong et al. data set  
 71 accounting for overdispersal.

| <b>Factor</b>                               | <b>Coefficient</b> | <b>SE</b> | <b>p</b> |
|---------------------------------------------|--------------------|-----------|----------|
| <b>Intercept</b>                            | -4.28              | 0.49      | 3.5e-15  |
| <b>log<sub>10</sub>(viremia)</b>            | 0.55               | 0.07      | 1.4e-13  |
| <b>Infection class<br/>(asymptomatic)</b>   | 0.75               | 0.85      | 0.38     |
| <b>Infection class<br/>(presymptomatic)</b> | 1.52               | 0.36      | 3.54e-5  |

72

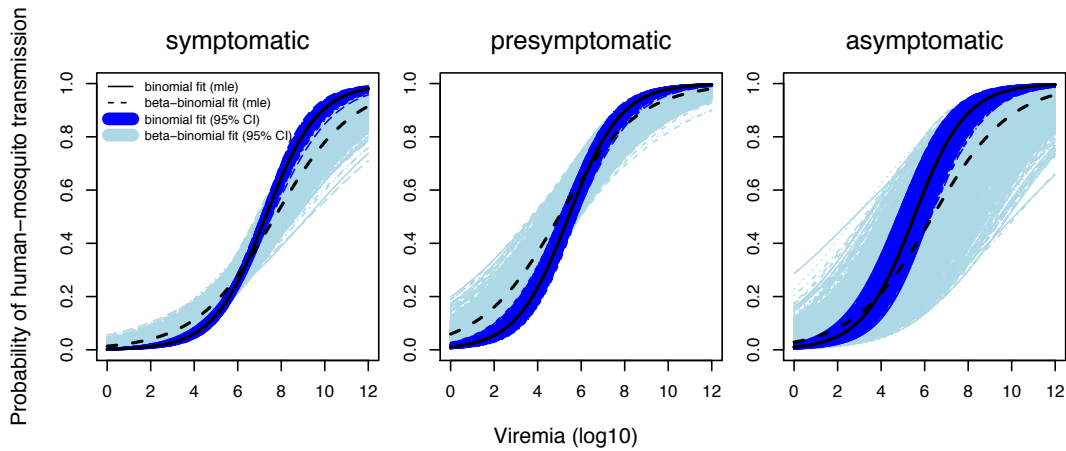

73  
 74 **Fig S2.4.** Comparative analysis of logistic model fits to Duong et al. data assuming  
 75 overdispersal of infection data (light blue) or not (dark blue). Different lines represent  
 76 unique draws from the posterior distribution of parameter values.

77

#### 78 **Accounting for infection class specific slopes**

79 Lastly, we assessed whether there is statistical support for the possibility that the slopes  
 80 of the logistic dose-response curves vary among infection classes. A likelihood ratio test  
 81 between a model with and without infection class-specific slopes showed statistical  
 82 support for the former ( $p = 0.0003$ ,  $df = 2$ ). This indicates that there is a distinct dose-  
 83 response curve for asymptomatic and pre-symptomatic infections (Fig S2.6), whereas  
 84 curves for asymptomatic and pre-symptomatic infections were estimated to be similar  
 85 when fitted using the simpler model variant (Fig S2.5).

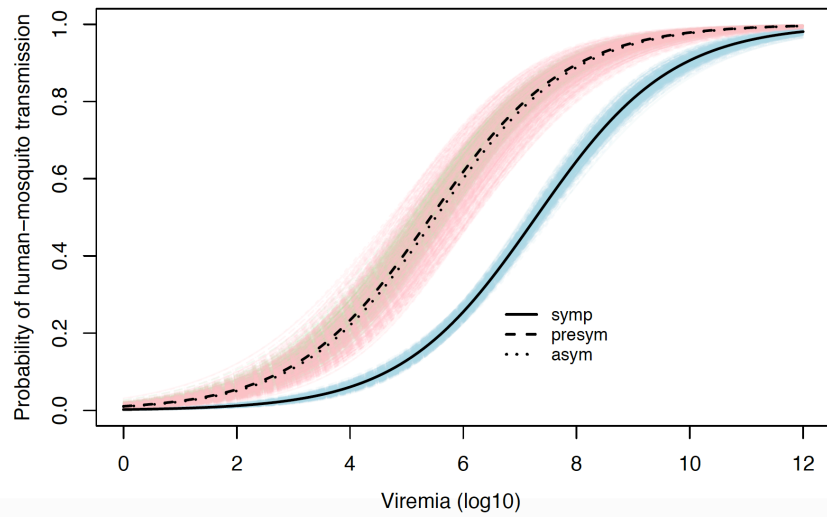

86  
 87 **Fig S2.5.** Logistic model fits to Duong et al. data by infection class with 95% credible  
 88 intervals (shaded).

89

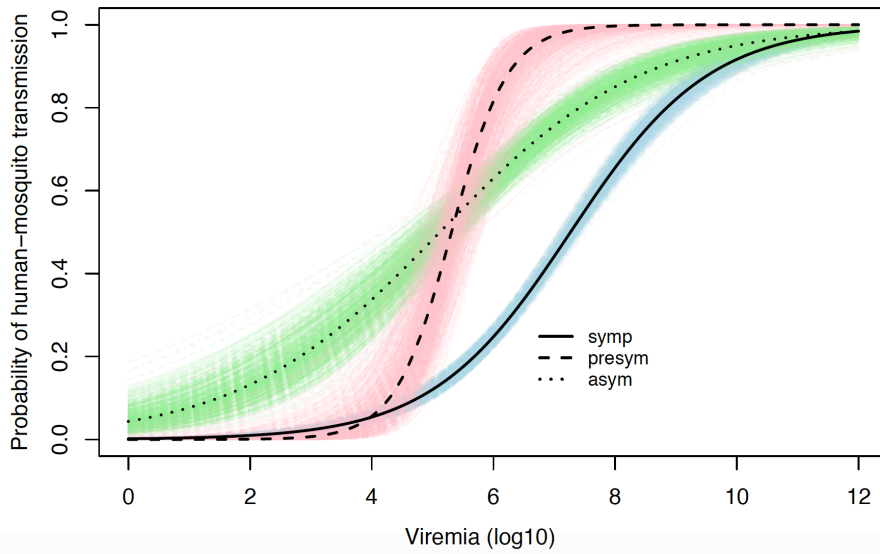

90  
 91 **Fig S2.6.** Logistic model fits to Duong et al. data by infection class with 95% credible  
 92 intervals (shaded), allowing for random intercepts.



93 **SUPPLEMENTARY REFERENCES**

- 94 1. Duong V, Lambrechts L, Paul RE, Ly S, Lay RS, Long KC, et al. Asymptomatic  
95 humans transmit dengue virus to mosquitoes. Proc Natl Acad Sci U S A. 2015;112:  
96 14688-14693.
- 97 2. Ferguson NM, Kien DT, Clapham H, Aguas R, Trung VT, Chau TN, et al. Modeling  
98 the impact on virus transmission of Wolbachia-mediated blocking of dengue virus  
99 infection of *Aedes aegypti*. Sci Transl Med. 2015;7: 279ra37.
- 100 3. Nguyen MN, Duong TH, Trung VT, Nguyen TH, Tran CN, Long VT, et al. Host and  
101 viral features of human dengue cases shape the population of infected and infectious  
102 *Aedes aegypti* mosquitoes. Proc Natl Acad Sci U S A. 2013;110: 9072-9077.
- 103 4. Burnham KP, Anderson DR. Model selection and multimodel inference: a practical  
104 information-theoretic approach. : Springer Science & Business Media; 2003.
