# Supplementary material for: Contributions from the silent majority dominate dengue virus transmission
Source: PubMed Central journal article supplement (PMC5933708; doi:10.1371/journal.ppat.1006965), 2018-05-03
Supplement: ppat.1006965.s003.pdf [file ppat.1006965.s003.pdf]

**Table S1.** Model parameters.

|                                                 | Parameter                                                            | Symbol        | Value (95% CI)                                                                                     | Equation | Ref. |
|-------------------------------------------------|----------------------------------------------------------------------|---------------|----------------------------------------------------------------------------------------------------|----------|------|
| <b>Modeling individual viremia trajectories</b> | Uninfected target cells                                              | $x$           | $A/\gamma$ (initial)                                                                               | 2        | [1]  |
|                                                 | Infected target cells                                                | $y$           | 0 (initial)                                                                                        | 2        | [2]  |
|                                                 | Free viral particles                                                 | $v$           | 1 (initial)                                                                                        | 2        | [2]  |
|                                                 | Clearing immune response                                             | $z$           | 1°S: 0.347 (0.285,0.548)<br>2°S: 0.411(0.248,0.594)<br>2°DHF: 0.380<br>(0.0298,0.526) (initial)    | 2        | [2]  |
|                                                 | Daily production of target cells                                     | $A$           | $1.4 \times 10^6$                                                                                  | 2        | [3]  |
|                                                 | Death rate target cells                                              | $\gamma$      | 0.14                                                                                               | 2        | [1]  |
|                                                 | Infection rate                                                       | $\beta$       | 1°S: 1.72 (1.50,1.98)<br>2°S: 2.30 (2.14,2.50)<br>2°DHF: 2.82 (2.58,3.23)<br>( $\times 10^{-10}$ ) | 2        | [2]  |
|                                                 | Death rate infected target cells                                     | $\delta$      | 0.14                                                                                               | 2        | [1]  |
|                                                 | Removal rate infected cells                                          | $\alpha$      | 0.001                                                                                              | 2        | [2]  |
|                                                 | Viral particle production rate                                       | $\omega$      | $1 \times 10^4$                                                                                    | 2        | [4]  |
| <b>Infectiousness calculations</b>              | Viremia ( $\log_{10}$ cDNA copies/mL)                                | $V$           | -                                                                                                  | 3-6      |      |
|                                                 | Logistic intercept                                                   | $\beta_0$     | A: -11.50 (-17.59,-4.16)<br>Pre-sym S: -3.09 (-4.24,-2.01)<br>Post-sym S: -6.37 (-7.12,-5.62)      | 3        | [5]  |
|                                                 | Slope coefficient                                                    | $\beta_1$     | A: 2.16 (0.92, 3.42)<br>Pre-sym S: 0.60 (0.43,0.77)<br>Post-sym S: 0.88 (0.77, 0.98)               | 3        | [5]  |
| <b>Population seroprofile calculation</b>       | Age                                                                  | $a$           |                                                                                                    | 7-8      |      |
|                                                 | Proportion pre-exposed to $i$ serotypes at age $a$                   | $e_i(a)$      |                                                                                                    | 7-8      |      |
|                                                 | Proportion cross-immune after exposure with $i$ serotypes at age $a$ | $r_i(a)$      |                                                                                                    | 7        |      |
|                                                 | Duration cross-immune period                                         | $\sigma^{-1}$ | 2 years                                                                                            | 1,7,13   | [6]  |
|                                                 | Proportion of the population in each age group                       | $p(a)$        |                                                                                                    | 8        |      |
|                                                 | Proportion of population pre-exposed to $i$ serotypes                | $E_i$         |                                                                                                    | 8-10     |      |
|                                                 | Proportion of population cross-immune after pre-                     | $R_i$         |                                                                                                    | 1,13     |      |

|                                                                   |                                                                                                                     | exposure to $i$ serotypes                                                                |             |                                                                      |         |
|-------------------------------------------------------------------|---------------------------------------------------------------------------------------------------------------------|------------------------------------------------------------------------------------------|-------------|----------------------------------------------------------------------|---------|
| <b>Meta-analysis of (A+IS):AS ratios</b>                          | <b>Disease outcome calculation</b>                                                                                  | Asymptomatic to symptomatic ratio given pre-exposure to $i$ serotypes                    | $\theta_i$  | 9.2%                                                                 | 9 [5]   |
|                                                                   |                                                                                                                     | Inapparent to apparent ratio given pre-exposure to $i$ serotypes                         | $\zeta_i$   | 1°: 0.82 (0.81,0.84)<br>2°: 0.76 (0.74,0.78)<br>>2°:0.86 (0.63,0.97) | 10 [7]  |
| <b>Contribution of each infection class to force of infection</b> |                                                                                                                     | Location and time-specific force of infection                                            | $\lambda_j$ |                                                                      |         |
|                                                                   |                                                                                                                     | Infection prevalence hosts                                                               | $X$         |                                                                      | 11-13   |
|                                                                   |                                                                                                                     | Probability that a susceptible host becomes infected upon a bite of an infectious vector | $b$         | Cancels out                                                          | 1,11    |
|                                                                   |                                                                                                                     | Ratio of vectors to hosts                                                                | $m$         | Cancels out                                                          | 1,11    |
|                                                                   |                                                                                                                     | Bites per vector lifetime                                                                | $a/g$       | 4                                                                    | 1,11-12 |
|                                                                   |                                                                                                                     | Infection prevalence vectors                                                             | $Y$         |                                                                      |         |
|                                                                   | Extrinsic incubation period                                                                                         | $n$                                                                                      | Cancels out | 1,11                                                                 |         |
|                                                                   | Probability that a susceptible vector becomes infected upon biting an infectious host given infectious class A or S | $c_{A \text{ or } S}$                                                                    |             | 11-13                                                                |         |
|                                                                   | Infectious period                                                                                                   | $\tau^{-1}$                                                                              | 5           |                                                                      |         |

## References

1. Gonzalez-Mejia ME, Doseff AI. Regulation of monocytes and macrophages cell fate. *Front Biosci.* 2009;14: 2413-2431.
2. Clapham HE, Tricou V, Van Vinh Chau N, Simmons CP, Ferguson NM. Within-host viral dynamics of dengue serotype 1 infection. *J R Soc Interface.* 2014;11: 10.1098/rsif.2014.0094.
3. iGPnotebook. White cell count. <http://www.gpnotebook.co.uk> (accessed 10 October 2013)
4. Cologna R, Rico-Hesse R. American genotype structures decrease dengue virus output from human monocytes and dendritic cells. *J Virol.* 2003;77: 3929-3938.
5. Duong V, Lambrechts L, Paul RE, Ly S, Lay RS, Long KC, et al. Asymptomatic humans transmit dengue virus to mosquitoes. *Proc Natl Acad Sci U S A.* 2015;112: 14688-14693.
6. Reich NG, Shrestha S, King AA, Rohani P, Lessler J, Kalayanarooj S, et al. Interactions between serotypes of dengue highlight epidemiological impact of cross-immunity. *J R Soc Interface.* 2013;10: 20130414.
7. Clapham HE, Cummings DA, Johansson MA. Immune status alters the probability of apparent illness due to dengue virus infection: Evidence from a pooled analysis across multiple cohort and cluster studies. *PLoS Negl Trop Dis.* 2017;11: e0005926.
