# Supplementary material for: Contributions from the silent majority dominate dengue virus transmission
Source: PubMed Central journal article supplement (PMC5933708; doi:10.1371/journal.ppat.1006965), 2018-05-03
Supplement: ppat.1006965.s004.pdf [file ppat.1006965.s004.pdf]

**Table S2.** Probabilistic comparison of net infectiousness uncertainty distributions.

|              |           | Asymptomatic |           | Symptomatic |           |
|--------------|-----------|--------------|-----------|-------------|-----------|
|              |           | Primary      | Secondary | Primary     | Secondary |
| Asymptomatic | Primary   | 0.50         | 0.44      | 0.55        | 0.50      |
|              | Secondary | 0.56         | 0.50      | 0.64        | 0.58      |
| Symptomatic  | Primary   | 0.45         | 0.36      | 0.50        | 0.38      |
|              | Secondary | 0.50         | 0.42      | 0.62        | 0.50      |

Probability that a randomly selected value of net infectiousness from the uncertainty distribution for individuals of the type specified by the column is greater than a randomly selected value for individuals of the type specified by the row. For example, there is a 57% chance that asymptomatic primary infections have a higher net infectiousness than asymptomatic secondary infections. To provide context, we note that this probability is 0.50 for identical distributions, <0.50 when the random variable on the column is smaller than the one on the row (blue), and >0.50 when the random variable on the column is larger than the one on the row (red).
