# Supplementary material for: Contributions from the silent majority dominate dengue virus transmission
Source: PubMed Central journal article supplement (PMC5933708; doi:10.1371/journal.ppat.1006965), 2018-05-03

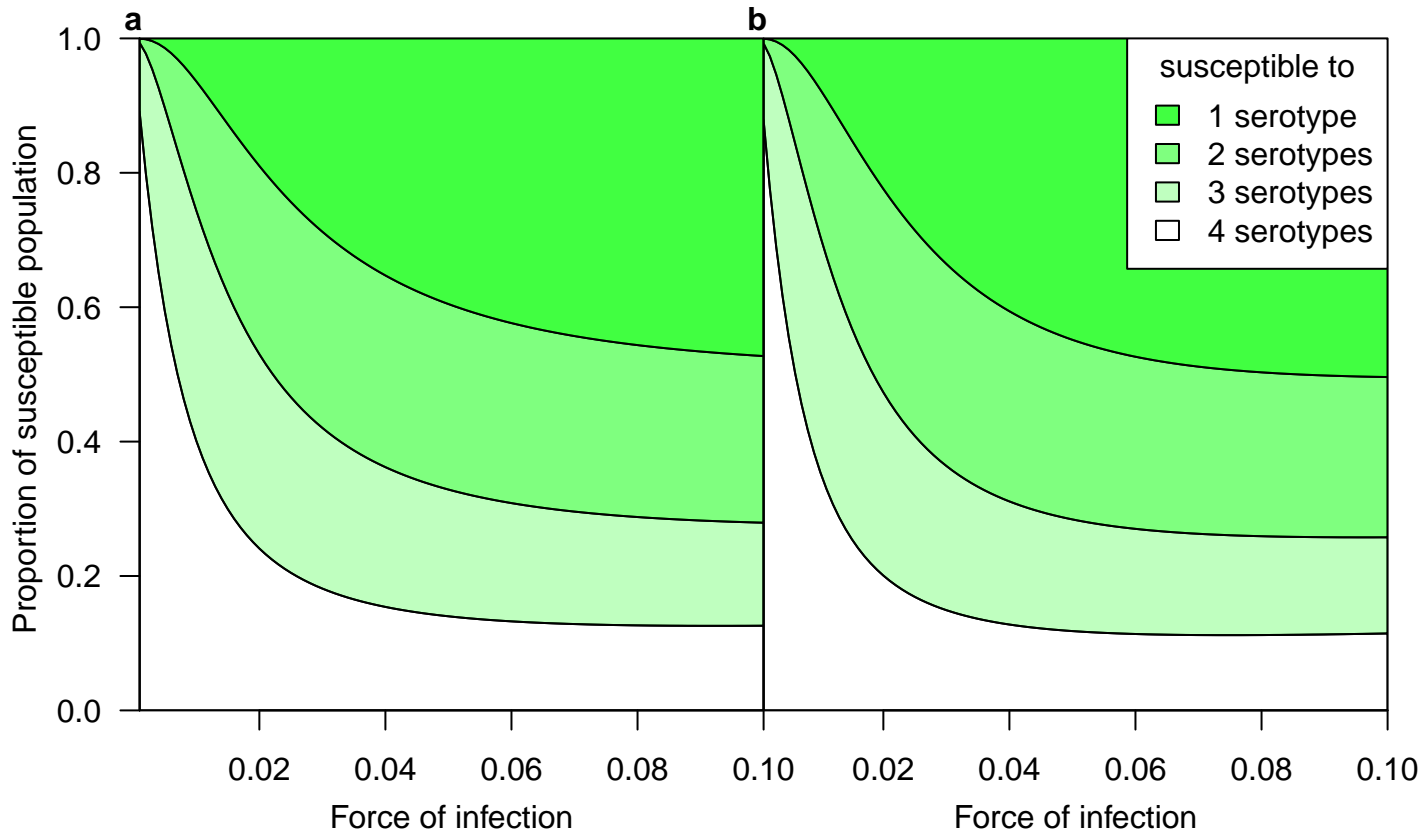

Supplement: ppat.1006965.s008.pdf [file ppat.1006965.s008.pdf]
