# Supplementary material for: Contributions from the silent majority dominate dengue virus transmission
Source: PubMed Central journal article supplement (PMC5933708; doi:10.1371/journal.ppat.1006965), 2018-05-03

# Contribution to uncertainty about

## Net infectiousness

## Proportion of infectiousness prior to symptoms

Asymptomatic  
primary

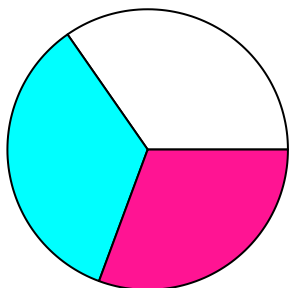

Asymptomatic  
secondary

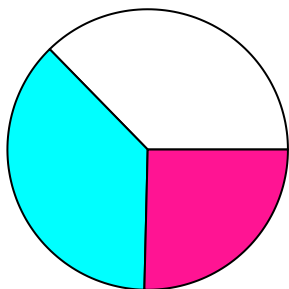

Symptomatic  
primary

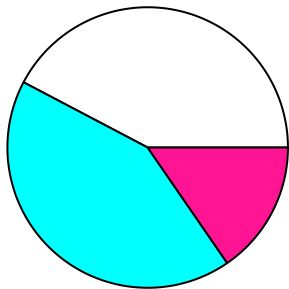

□ Viremia  
■ Infectiousness  
■ IIP

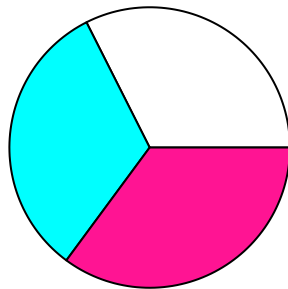

Symptomatic  
secondary

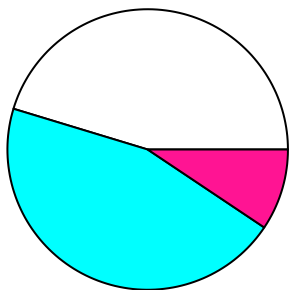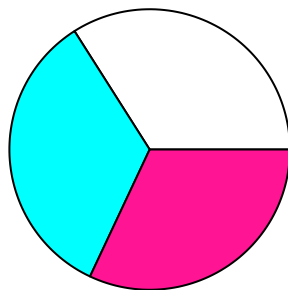

Supplement: ppat.1006965.s010.pdf [file ppat.1006965.s010.pdf]
