# Supplementary material for: Contributions from the silent majority dominate dengue virus transmission
Source: PLOS journal article supplement (doi:10.1371/journal.ppat.1006965), 2018-05-03
Supplement: S1 (10.1371/journal.ppat.1006965.s001) [file journal.ppat.1006965.s001]

1 **Text S1. Assessment of model assumptions and limitations**

2 Our results support the hypothesis that inapparent infections contribute substantially to  
3 DENV transmission. There are a number of uncertainties, however, that underscore the  
4 need for future research on the human immune response to DENV infection and  
5 correlates of disease severity. Below, we review the main limitations and data gaps  
6 identified by our analysis.

- 7 • **Other predictors of infectiousness than plasma viral load.** Viremia is typically  
8 estimated with the concentration of viral genome copies in plasma. Other factors have  
9 been found to influence the probability of transmission to mosquitoes, such as  
10 serological response and the day of illness [1]. Similarly, measures of infectious virus  
11 across viremia profiles are needed to more fully understand how viremia dynamics  
12 relate to a person's infectiousness to mosquitoes.
- 13 • **Limited immunological complexity of the within-host model.** In the absence of  
14 data on target cell populations or effector immune responses, the ability to fit models  
15 with greater complexity and, thereby, to enhance understanding of the human  
16 immune response is limited [2,3]. Such studies could help reveal correlates of  
17 differences in viremia between primary and secondary infections and gain  
18 understanding on the mechanism(s) underlying enhanced infection efficiency in  
19 people with asymptomatic and pre-symptomatic infections.
- 20 • **Infectiousness prior to onset of symptoms.** The within-host models that we used to  
21 estimate viremia in people with symptomatic infections were fitted to post-  
22 symptomatic viremia data only. Although realizations of pre-symptomatic viremia  
23 were robust to the structural and parameter uncertainty that we explored [4], the

24 absence of pre-symptomatic data could lead to underestimation of early viremia  
25 levels and, as a consequence, underestimation of pre-symptomatic infectiousness. In  
26 addition, some parameters that drive early viremia trajectories were pre-assigned due  
27 to identifiability restrictions, resulting in underestimation of variation in pre-  
28 symptomatic viremia. Obtaining early viremia titer data, either through clustered  
29 sampling around index cases (i.e., geographic or contact clusters) or possibly through  
30 human challenge studies, depending on the virus strains used, would improve our  
31 understanding of early DENV pathogenesis.

32 • **Viremia trajectories and infectiousness in inapparent symptomatic (IS)**  
33 **infections.** The within-host model was fitted to data of apparent DENV infections  
34 (AS). While severe or hospitalized dengue cases have been associated with higher  
35 viremia levels than mild AS infections [1,5,6], it is unclear whether this extrapolates  
36 to IS infections. Similarly, significant differences between infection efficiency were  
37 found between severe and mild AS infections [1] as well as between As and S  
38 infections [7], but where IS infections fall on this spectrum remains to be elucidated.  
39 Antibodies are believed to play a role in viral clearance and may harbor information  
40 on viral trajectories across clinical outcomes [3]. While no significant differences in  
41 qualitative and quantitative antibody responses were found in children recovered from  
42 a primary IS or AS infection, the breadth in both pre-existing and post-infection  
43 antibodies differed significantly between secondary IS and AS infections [8]. Given  
44 these uncertainties, we explored the two extreme scenarios: assuming IS infections to  
45 be similar to either AS or As infections. The former was treated as the default  
46 scenario to ensure consistency with the clinical subgroups used in Duong et al.[7].

47 The difference between the two scenarios in terms of estimated median contribution  
48 of silent infections was 4%.

49 • **Viremia trajectories in asymptomatic (As) infections.** An empirically supported  
50 reduction factor was applied [7] to distinguish between viremia in As and  
51 symptomatic (S) infections. However, this factor may be confounded by the timing of  
52 the plasma titer measurements [7]. As infections are difficult to identify and the  
53 timing of infection is harder to infer than in symptomatic cases. Human challenge  
54 studies could aid in clarifying the relationship between viremia progression in relation  
55 to clinical outcome [9].

56 • **Post-secondary infections.** Little is known about the susceptibility to infection,  
57 viremia trajectories, and infectiousness of post-secondary infections, in part because  
58 determining a person's pre-exposure history after they have been infected with two  
59 different DENV serotypes is not reliable [10]. Given the low proportion of AS  
60 infections resulting from post-secondary infections (Fig S2), this may well be  
61 accompanied with lower viral loads and lower net infectiousness [11,12]. As such, the  
62 contribution of inapparent post-secondary infections may be lower than primary and  
63 secondary infections. Under the assumption that post-secondary infectiousness is  
64 equivalent to that of secondary infections (Fig S1), we estimated that the contribution  
65 of As+IS infections could be up to 11% (95% CI 10-13%) higher when accounting  
66 for these infections. This should be regarded as an upper bound, because the  
67 proportion of As infections among post-secondary infections may well be higher than  
68 among primary and secondary infections.

- 69 • **Uncertainty and individual heterogeneity.** The steep relationship between viral  
70 load and transmission probability [7] in asymptomatic infections is subject to large  
71 uncertainty. This results in a broad bimodal pattern in net infectiousness in which a  
72 large proportion of asymptomatic infections displays very little infectiousness  
73 whereas some are much more infectious than symptomatic individuals. It is not clear  
74 how much of this results from parameter uncertainty and how much is a reflection of  
75 individual heterogeneity. The fact that the steepness of this relationship is not  
76 conserved to the same extent in the data from indirect feeding assays [7] is suggestive  
77 of, but not conclusive about, a larger role of uncertainty than individual  
78 heterogeneity. Larger sample sizes are required to resolve this issue.
- 79 • **Definitions and study designs differ across As:IS:AS rates.** The proportion of  
80 apparent infections detected may vary according to the study design used [13], with  
81 very active surveillance, as is typical in vaccine trials, resulting in somewhat higher  
82 estimates of the proportion of apparent infections [14]. Individuals detected as  
83 asymptomatic may become symptomatic later on, something not all study designs  
84 account for. This can result in overestimates of As infections at the expense of S  
85 infections. A universal, continuous metric for clinical dengue severity could aid in  
86 revealing correlates of dengue disease severity that currently go unnoticed in  
87 categorical analyses.
- 88 • **Additional factors influencing viremia, infectiousness, and clinical outcomes.**  
89 While the estimated viral titers used in this analysis were fitted to only DENV-1,  
90 these titers may well vary across serotypes [1,2,15], and may be affected by the time  
91 since previous infection and the serotype a person was pre-exposed to. Similarly,

92 infectiousness is found to vary across virus serotypes [1], genotypes [16], and vector-  
93 virus genotype interactions [17]. Rates of clinical disease and detection can vary  
94 across regions due to factors such as DENV serotype [18], genotype [9,19], the  
95 clinical outcome of a previous DENV infection [13,19] and time since a previous  
96 outbreak [8], altering the relative contributions of infection classes.

97 • **Relation between symptoms and detection.** In our analysis, detection rates relied on  
98 the assumption that the severity of symptoms is proportional to the proportion of  
99 DENV infections detected by disease surveillance systems; i.e., IS are assumed not to  
100 be detected. However, health-seeking behavior depends on many factors, not all of  
101 which are related to the severity of symptoms. These include socio-economic factors,  
102 access to health care, and the perception of the quality of available care, among others  
103 [20]. In addition, there can be a delay between symptom onset and health seeking and  
104 detection. Therefore, the contribution of individuals prior to detection is almost  
105 certainly a conservative underestimate.

106 • **Extrinsic incubation period (EIP) may vary as a result of viral load [21-23].** The  
107 relatively lower viremia of asymptomatic and secondary infections could increase the  
108 length of the incubation period in the mosquito and consequently the net contributions  
109 of those infection classes. At a given viremia level, however, people with  
110 asymptomatic infections contributed to a higher mosquito viral load than those with  
111 symptomatic infections [7]. The impact of lower asymptomatic viremia on the EIP,  
112 therefore, may be smaller than expected based solely on viremia. Future  
113 xenodiagnostic assessments of infectiousness to mosquitoes would be enhanced by  
114 quantifying mosquito infection to test this hypothesis across infection classes.

115 • **Individuals that develop severe dengue may have a different infectiousness**  
116 **profile.** Viremia estimates from Clapham et al. [4] are consistent with a higher peak  
117 viral load and increased cell entry in individuals that develop severe dengue  
118 compared to mild dengue cases. It is unclear how infectiousness differs for severe  
119 cases, because temporal confounding due to differential health seeking behavior has  
120 hampered direct comparison between severe and mild infections [1]. The impact of  
121 including severe cases in the analysis is minor due to their small numerical  
122 prominence, but their inclusion does increase the contribution of post-symptomatic  
123 DAS infections from 1.0% (95% CI: 0.8-1.1%) to 2.1% (95% CI: 0.8-3.6). Severe  
124 dengue cases will likely present with impaired mobility and hospitalization, which  
125 could also affect their contact rates [24]. However, severe symptoms typically occur  
126 after the infectious period has ended, so differences in contact rates between severe  
127 and mild dengue cases could end up having a modest impact on their relative  
128 contributions to transmission.

129

### 130 **SUPPLEMENTARY REFERENCES**

- 131 1. Nguyen MN, Duong TH, Trung VT, Nguyen TH, Tran CN, Long VT, et al. Host and viral  
132 features of human dengue cases shape the population of infected and infectious *Aedes aegypti*  
133 mosquitoes. Proc Natl Acad Sci U S A. 2013;110: 9072-9077.
- 134 2. Ben-Shachar R, Schmidler S, Koelle K. Drivers of Inter-individual Variation in Dengue Viral  
135 Load Dynamics. PLoS Comput Biol. 2016;12: e1005194.
- 136 3. Clapham HE, Quyen TH, Kien DTH, Dorigatti I, Simmons CP, Ferguson NM. Modelling  
137 Virus and Antibody Dynamics during Dengue Virus Infection Suggests a Role for Antibody in  
138 Virus Clearance. PLoS Comput Biol. 2016;12: e1004951.

139 4. Clapham HE, Tricou V, Van Vinh Chau N, Simmons CP, Ferguson NM. Within-host viral  
140 dynamics of dengue serotype 1 infection. *J R Soc Interface*. 2014;11: 10.1098/rsif.2014.0094.  
141 5. Vaughn DW, Green S, Kalayanarooj S, Innis BL, Nimmannitya S, Suntayakorn S, et al.  
142 Dengue viremia titer, antibody response pattern, and virus serotype correlate with disease  
143 severity. *J Infect Dis*. 2000;181: 2-9.  
144 6. Murgue B, Roche C, Chungue E, Deparis X. Prospective study of the duration and magnitude  
145 of viraemia in children hospitalised during the 1996-1997 dengue-2 outbreak in French Polynesia.  
146 *J Med Virol*. 2000;60: 432-438.  
147 7. Duong V, Lambrechts L, Paul RE, Ly S, Lay RS, Long KC, et al. Asymptomatic humans  
148 transmit dengue virus to mosquitoes. *Proc Natl Acad Sci U S A*. 2015;112: 14688-14693.  
149 8. Corbett KS, Katzelnick L, Tissera H, Amerasinghe A, de Silva AD, de Silva AM. Preexisting  
150 neutralizing antibody responses distinguish clinically inapparent and apparent dengue virus  
151 infections in a Sri Lankan pediatric cohort. *J Infect Dis*. 2015;211: 590-599.  
152 9. Mammen M, Lyons A, Innis B, Sun W, McKinney D, Chung R, et al. Evaluation of dengue  
153 virus strains for human challenge studies. *Vaccine*. 2014;32: 1488-1494.  
154 10. Guzmán MG, Kourí G. Dengue diagnosis, advances and challenges. *Int J Infect Dis*. 2004;8:  
155 69-80.  
156 11. Olkowski S, Forshey BM, Morrison AC, Rocha C, Vilcarrromero S, Halsey ES, et al. Reduced  
157 risk of disease during postsecondary dengue virus infections. *J Infect Dis*. 2013;208: 1026-1033.  
158 12. Montoya M, Gresh L, Mercado JC, Williams KL, Vargas MJ, Gutierrez G, et al. Symptomatic  
159 versus inapparent outcome in repeat dengue virus infections is influenced by the time interval  
160 between infections and study year. *PLoS Negl Trop Dis*. 2013;7: e2357.  
161 13. Clapham HE, Cummings DA, Johansson MA. Immune status alters the probability of  
162 apparent illness due to dengue virus infection: Evidence from a pooled analysis across multiple  
163 cohort and cluster studies. *PLoS Negl Trop Dis*. 2017;11: e0005926.

- 164 14. Ferguson NM, Rodríguez-Barraquer I, Dorigatti I, Mier-y-Teran-Romero L, Laydon DJ,  
165 Cummings DA. Benefits and risks of the Sanofi-Pasteur dengue vaccine: Modeling optimal  
166 deployment. *Science*. 2016;353: 1033-1036.
- 167 15. Ferguson NM, Kien DT, Clapham H, Aguas R, Trung VT, Chau TN, et al. Modeling the  
168 impact on virus transmission of Wolbachia-mediated blocking of dengue virus infection of *Aedes*  
169 *aegypti*. *Sci Transl Med*. 2015;7: 279ra37.
- 170 16. Lambrechts L, Fansiri T, Pongsiri A, Thaisomboonsuk B, Klungthong C, Richardson JH, et  
171 al. Dengue-1 virus clade replacement in Thailand associated with enhanced mosquito  
172 transmission. *J Virol*. 2012;86: 1853-1861.
- 173 17. Lambrechts L, Knox TB, Wong J, Liebman KA, Albright RG, Stoddard ST. Shifting  
174 priorities in vector biology to improve control of vector-borne disease. *Trop Med Int Health*.  
175 2009;14: 1505-1514.
- 176 18. Grange L, Simon-Loriere E, Sakuntabhai A, Gresh L, Paul R, Harris E. Epidemiological risk  
177 factors associated with high global frequency of inapparent dengue virus infections. *Frontiers in*  
178 *immunology*. 2014;5.
- 179 19. Katzelnick LC, Montoya M, Gresh L, Balmaseda A, Harris E. Neutralizing antibody titers  
180 against dengue virus correlate with protection from symptomatic infection in a longitudinal  
181 cohort. *Proc Natl Acad Sci U S A*. 2016;113: 728-733.
- 182 20. Khun S, Manderson L. Health seeking and access to care for children with suspected dengue  
183 in Cambodia: an ethnographic study. *BMC Public Health*. 2007;7: 1.
- 184 21. Watts DM, Burke DS, Harrison BA, Whitmire RE, Nisalak A. Effect of temperature on the  
185 vector efficiency of *Aedes aegypti* for dengue 2 virus. *Am J Trop Med Hyg*. 1987;36: 143-152.
- 186 22. Fontaine A, Jiolle D, Moltini-Conclois I, Lequime S, Lambrechts L. Excretion of dengue  
187 virus RNA by *Aedes aegypti* allows non-destructive monitoring of viral dissemination in  
188 individual mosquitoes. *Sci Rep*. 2016;6: 24885.



- 189 23. Bates M, Roca-Garcia M. Laboratory Studies of the Saimiri-Haemagog'us Cycle of Jungle  
190 Yellow Fever. American Journal of Tropical Medicine. 1945;25: 203-216.
- 191 24. Perkins TA, Paz-Soldan VA, Stoddard ST, Morrison AC, Forshey BM, Long KC, et al.  
192 Calling in sick: impacts of fever on intra-urban human mobility. Proc Biol Sci. 2016;283:  
193 10.1098/rspb.2016.0390.
