# Supplementary material for: Contributions from the silent majority dominate dengue virus transmission
Source: PLoS Pathog. 2018 May 3;14(5):e1006965. doi: 10.1371/journal.ppat.1006965 (PMC5933708; doi:10.1371/journal.ppat.1006965)
Supplement: S4 Table — (XLSX) [file ppat.1006965.s006.xlsx]

## Sheet: STable4.csv
participant_ID	feeding_method	age	gender	serotype	disease_class	plasma_viremia	mosquito_infection
22	direct	9	f	D1	symp	1910	0
29	direct	9	f	D1	symp	19600	0
28	direct	11	f	D1	symp	18300	0
27	direct	4	m	D1	symp	6530	0
75	direct	6	f	D1	symp	753000	0
83	direct	5	m	D1	symp	14100	0
76	direct	15	f	D1	symp	342	0
64	direct	5	f	D1	asymp	3160	0
6	direct	13	f	D4	symp	137	0
7	direct	6	f	D4	symp	112000000	0
138	direct	5	m	D1	presymp	207000000	1
139	direct	16	f	D1	presymp	7320000	1
149	direct	30	f	D1	presymp	50000000	0
152	direct	4	f	D1	symp	70300000	1
4	direct	14	f	D4	presymp	30900000	0
5	direct	12	f	D4	presymp	1450000000	1
31	direct	5	m	D4	presymp	29900	0
150	direct	9	f	D1	presymp	32700000	1
151	direct	9	f	D1	presymp	10100000	1
62	direct	5	m	D1	asymp	0	0
63	direct	7	m	D1	presymp	68200000	1
73	direct	10	m	D1	asymp	0	1
74	direct	6	m	D1	symp	4570	0
21	direct	12	m	D1	symp	9460	0
68	direct	8	f	D1	symp	18000000	1
54	direct	5	m	D1	symp	1500000000	1
8	direct	14	f	D4	symp	1620000	0
145	direct	6	m	D1	presymp	846000	1
2	direct	8	m	D1	presymp	1640	0
33	direct	17	m	D2	symp	1160	0
41	direct	8	m	D2	presymp	181000	1
42	direct	15	f	D2	presymp	0	1
43	direct	11	m	D2	presymp	0	1
44	direct	5	m	D2	asymp	250000	1
45	direct	5	f	D2	symp	23100	1
23	direct	12	m	D1	symp	17300	0
49	direct	12	m	D2	asymp	12100000	1
51	direct	25	m	D2	symp	47100	1
52	direct	27	m	D2	presymp	4530000	1
50	direct	11	m	D4	asymp	3400	0
34	direct	8	f	D2	presymp	71400	0
59	direct	8	m	D4	symp	310000	0
53	direct	4	m	D2	symp	23600000	1
60	direct	5	f	D4	symp	145000	0
9	direct	8	m	D4	symp	61300	0
36	direct	7	f	D2	symp	6070	0
56	direct	8	m	D1	symp	768000	0
37	direct	5	m	D2	presymp	443000	0
38	direct	6	f	D2	symp	224000000	1
39	direct	7	f	D2	presymp	12000000	1
3	direct	5	m	D1	symp	205000000	1
69	direct	7	m	D1	symp	146000000	1
70	direct	5	m	D1	symp	4430000	1
79	direct	5	m	D1	symp	98500000	1
11	direct	13	m	D4	symp	764000000	0
24	direct	12	m	D1	symp	14600000	1
25	direct	11	m	D1	symp	48600000	1
26	direct	6	f	D4	symp	37800000	0
10	direct	13	f	D4	symp	12900000	1
78	direct	13	m	D2	symp	2950000	1
40	direct	12	f	D4	symp	582000000	1
77	direct	11	m	D4	presymp	528000	0
12	direct	5	f	D4	symp	2170000	0
71	direct	6	m	D1	symp	1410000000	1
72	direct	8	m	D1	symp	1630	1
84	direct	6	m	D1	symp	1100000	1
46	direct	5	f	D2	presymp	1340000	1
85	direct	6	m	D1	presymp	1020000000	1
86	direct	5	m	D1	symp	93900000	0
146	direct	16	f	D2	symp	297000	0
147	direct	10	f	D2	symp	102000	0
148	direct	7	m	D2	symp	43900000	1
13	direct	15	f	D4	symp	162000	0
14	direct	8	f	D4	symp	1190	0
47	direct	7	m	D4	symp	789	0
15	direct	13	m	D4	symp	56400000	0
142	direct	7	f	D2	symp	1750000	0
118	direct	4	f	D2	symp	5680	0
1	direct	9	m	D1	presymp	39600000	1
16	direct	8	m	D4	symp	172000	0
19	direct	6	m	D4	symp	62500000	1
88	direct	15	f	D4	symp	9600000	0
58	direct	6	m	D4	symp	41100	0
35	direct	14	m	D1	symp	482000000	1
48	direct	9	m	D2	symp	1090000	0
17	direct	10	f	D4	symp	2360	0
18	direct	6	f	D4	symp	270000000	1
20	direct	7	f	D4	symp	37100000	1
159	direct	19	m	D2	symp	121000	0
87	direct	25	f	D1	asymp	244000	0
160	direct	9	f	D2	symp	3470000	0
161	direct	4	m	D4	symp	45300000	1
143	direct	8	f	D4	symp	2080	0
162	direct	12	f	D4	symp	31600000	0
155	direct	13	m	D4	symp	14100000	0
163	direct	8	f	D4	presymp	37100000	1
156	direct	9	f	D4	symp	91400000	0
154	direct	11	m	D4	asymp	893000	0
126	direct	6	f	D2	symp	25800000	0
133	direct	4	f	D2	symp	97100000	0
157	direct	11	m	D2	symp	9350000	1
132	direct	21	f	D2	symp	3080000	0
130	direct	6	m	D2	symp	203000	0
131	direct	8	f	D2	presymp	1000000000	1
127	direct	5	f	D2	presymp	9780	1
128	direct	26	m	D2	presymp	0	1
134	direct	8	f	D2	symp	571000000	1
135	direct	6	m	D2	symp	41	0
158	direct	21	m	D4	symp	62800000	0
66	direct	5	m	D1	symp	776	0
32	direct	6	m	D4	symp	9390000	0
129	direct	23	m	D2	symp	18800000	0
61	direct	12	m	D1	symp	1930000000	1
164	direct	9	f	D2	symp	1830	0
119	direct	10	f	D3	symp	95700000	1
120	direct	12	m	D3	symp	312000000	1
140	direct	16	m	D2	symp	475000	0
141	direct	7	f	D2	presymp	124000	0
153	direct	6	m	D2	symp	2700000000	0
124	direct	4	m	D1	symp	768000	0
30	direct	11	m	D1	symp	137000	0
95	direct	10	m	D1	symp	97800000	1
96	direct	7	m	D1	symp	11300000000	1
97	direct	5	f	D1	symp	34000	0
98	direct	10	m	D1	symp	34200	0
99	direct	4	m	D1	symp	2360000	0
100	direct	11	f	D1	symp	109000000	1
101	direct	14	f	D1	symp	8300000	0
102	direct	6	f	D1	symp	15700	0
103	direct	6	m	D1	symp	400000	0
104	direct	5	f	D1	symp	355000	0
105	direct	5	m	D1	symp	27900000	1
106	direct	6	f	D1	symp	20900000	1
107	direct	6	m	D1	symp	15900000	0
67	direct	8	m	D1	presymp	5580000	0
108	direct	6	m	D1	symp	39300000	1
125	direct	6	m	D1	symp	36800000	0
57	direct	17	m	D2	asymp	839	0
116	direct	6	m	D1	presymp	5570000	1
55	direct	28	f	D1	asymp	5530	0
89	direct	7	m	D1	symp	112000	0
117	direct	17	f	D1	presymp	17000	0
80	direct	5	f	D1	presymp	493000000	1
136	direct	9	m	D1	symp	206000000	1
93	direct	12	f	D1	symp	1050000000	0
109	direct	12	m	D1	symp	1950000	0
137	direct	10	m	D1	presymp	82800000	1
90	direct	6	m	D1	symp	15200	0
91	direct	4	f	D1	symp	21900	0
92	direct	5	f	D1	symp	18000	0
81	direct	7	f	D1	symp	166000	0
82	direct	7	f	D1	symp	680000	0
112	direct	13	f	D1	symp	814000000	0
144	direct	5	m	D1	symp	1950000	0
113	direct	36	f	D1	presymp	183000000	1
94	direct	4	f	D1	symp	68900	0
110	direct	8	f	D1	symp	138000	0
111	direct	6	m	D1	symp	17100000	0
65	direct	22	f	D1	presymp	28900000	0
114	direct	18	m	D1	presymp	90700	0
115	direct	31	f	D1	presymp	1850000000	1
121	direct	7	f	D1	symp	52600	0
122	direct	5	m	D1	presymp	11500	1
123	direct	15	m	D1	symp	9670000	0
22	direct	9	f	D1	symp	1910	0
29	direct	9	f	D1	symp	19600	0
28	direct	11	f	D1	symp	18300	0
27	direct	4	m	D1	symp	6530	0
75	direct	6	f	D1	symp	753000	0
83	direct	5	m	D1	symp	14100	0
76	direct	15	f	D1	symp	342	0
64	direct	5	f	D1	asymp	3160	0
7	direct	6	f	D4	symp	112000000	0
138	direct	5	m	D1	presymp	207000000	1
139	direct	16	f	D1	presymp	7320000	1
4	direct	14	f	D4	presymp	30900000	0
5	direct	12	f	D4	presymp	1450000000	1
31	direct	5	m	D4	presymp	29900	0
150	direct	9	f	D1	presymp	32700000	1
151	direct	9	f	D1	presymp	10100000	1
62	direct	5	m	D1	asymp	0	0
63	direct	7	m	D1	presymp	68200000	1
73	direct	10	m	D1	asymp	0	0
74	direct	6	m	D1	symp	4570	1
21	direct	12	m	D1	symp	9460	0
68	direct	8	f	D1	symp	18000000	1
54	direct	5	m	D1	symp	1500000000	1
8	direct	14	f	D4	symp	1620000	0
145	direct	6	m	D1	presymp	846000	1
2	direct	8	m	D1	presymp	1640	0
33	direct	17	m	D2	symp	1160	0
41	direct	8	m	D2	presymp	181000	1
42	direct	15	f	D2	presymp	0	1
43	direct	11	m	D2	presymp	0	0
44	direct	5	m	D2	asymp	250000	1
45	direct	5	f	D2	symp	23100	1
23	direct	12	m	D1	symp	17300	0
49	direct	12	m	D2	asymp	12100000	1
51	direct	25	m	D2	symp	47100	0
52	direct	27	m	D2	presymp	4530000	1
50	direct	11	m	D4	asymp	3400	0
34	direct	8	f	D2	presymp	71400	0
59	direct	8	m	D4	symp	310000	0
53	direct	4	m	D2	symp	23600000	1
60	direct	5	f	D4	symp	145000	0
9	direct	8	m	D4	symp	61300	0
36	direct	7	f	D2	symp	6070	0
56	direct	8	m	D1	symp	768000	0
37	direct	5	m	D2	presymp	443000	0
38	direct	6	f	D2	symp	224000000	1
39	direct	7	f	D2	presymp	12000000	1
3	direct	5	m	D1	symp	205000000	1
69	direct	7	m	D1	symp	146000000	1
70	direct	5	m	D1	symp	4430000	1
79	direct	5	m	D1	symp	98500000	1
11	direct	13	m	D4	symp	764000000	1
24	direct	12	m	D1	symp	14600000	1
25	direct	11	m	D1	symp	48600000	1
26	direct	6	f	D4	symp	37800000	0
10	direct	13	f	D4	symp	12900000	1
78	direct	13	m	D2	symp	2950000	0
40	direct	12	f	D4	symp	582000000	1
77	direct	11	m	D4	presymp	528000	0
12	direct	5	f	D4	symp	2170000	0
71	direct	6	m	D1	symp	1410000000	1
72	direct	8	m	D1	symp	1630	1
84	direct	6	m	D1	symp	1100000	1
46	direct	5	f	D2	presymp	1340000	0
85	direct	6	m	D1	presymp	1020000000	1
86	direct	5	m	D1	symp	93900000	0
146	direct	16	f	D2	symp	297000	0
147	direct	10	f	D2	symp	102000	0
148	direct	7	m	D2	symp	43900000	0
13	direct	15	f	D4	symp	162000	0
14	direct	8	f	D4	symp	1190	0
47	direct	7	m	D4	symp	789	0
15	direct	13	m	D4	symp	56400000	0
142	direct	7	f	D2	symp	1750000	0
118	direct	4	f	D2	symp	5680	0
1	direct	9	m	D1	presymp	39600000	1
16	direct	8	m	D4	symp	172000	0
19	direct	6	m	D4	symp	62500000	1
88	direct	15	f	D4	symp	9600000	0
58	direct	6	m	D4	symp	41100	0
35	direct	14	m	D1	symp	482000000	1
48	direct	9	m	D2	symp	1090000	0
17	direct	10	f	D4	symp	2360	0
18	direct	6	f	D4	symp	270000000	1
20	direct	7	f	D4	symp	37100000	1
159	direct	19	m	D2	symp	121000	0
87	direct	25	f	D1	asymp	244000	0
160	direct	9	f	D2	symp	3470000	0
161	direct	4	m	D4	symp	45300000	0
143	direct	8	f	D4	symp	2080	0
162	direct	12	f	D4	symp	31600000	0
155	direct	13	m	D4	symp	14100000	0
163	direct	8	f	D4	presymp	37100000	1
156	direct	9	f	D4	symp	91400000	1
154	direct	11	m	D4	asymp	893000	0
126	direct	6	f	D2	symp	25800000	0
133	direct	4	f	D2	symp	97100000	0
157	direct	11	m	D2	symp	9350000	1
132	direct	21	f	D2	symp	3080000	0
130	direct	6	m	D2	symp	203000	0
131	direct	8	f	D2	presymp	1000000000	1
127	direct	5	f	D2	presymp	9780	1
128	direct	26	m	D2	presymp	0	1
134	direct	8	f	D2	symp	571000000	1
135	direct	6	m	D2	symp	41	0
158	direct	21	m	D4	symp	62800000	1
66	direct	5	m	D1	symp	776	0
32	direct	6	m	D4	symp	9390000	1
129	direct	23	m	D2	symp	18800000	0
61	direct	12	m	D1	symp	1930000000	1
164	direct	9	f	D2	symp	1830	0
119	direct	10	f	D3	symp	95700000	1
120	direct	12	m	D3	symp	312000000	1
140	direct	16	m	D2	symp	475000	0
141	direct	7	f	D2	presymp	124000	0
153	direct	6	m	D2	symp	2700000000	0
124	direct	4	m	D1	symp	768000	0
30	direct	11	m	D1	symp	137000	0
95	direct	10	m	D1	symp	97800000	1
96	direct	7	m	D1	symp	11300000000	1
97	direct	5	f	D1	symp	34000	0
98	direct	10	m	D1	symp	34200	0
99	direct	4	m	D1	symp	2360000	0
100	direct	11	f	D1	symp	109000000	1
101	direct	14	f	D1	symp	8300000	0
102	direct	6	f	D1	symp	15700	0
103	direct	6	m	D1	symp	400000	0
104	direct	5	f	D1	symp	355000	0
105	direct	5	m	D1	symp	27900000	1
106	direct	6	f	D1	symp	20900000	1
107	direct	6	m	D1	symp	15900000	0
67	direct	8	m	D1	presymp	5580000	0
108	direct	6	m	D1	symp	39300000	1
125	direct	6	m	D1	symp	36800000	0
57	direct	17	m	D2	asymp	839	0
116	direct	6	m	D1	presymp	5570000	1
55	direct	28	f	D1	asymp	5530	0
117	direct	17	f	D1	presymp	17000	0
80	direct	5	f	D1	presymp	493000000	0
136	direct	9	m	D1	symp	206000000	1
93	direct	12	f	D1	symp	1050000000	0
109	direct	12	m	D1	symp	1950000	0
137	direct	10	m	D1	presymp	82800000	1
90	direct	6	m	D1	symp	15200	0
91	direct	4	f	D1	symp	21900	0
92	direct	5	f	D1	symp	18000	0
81	direct	7	f	D1	symp	166000	0
82	direct	7	f	D1	symp	680000	0
112	direct	13	f	D1	symp	814000000	0
144	direct	5	m	D1	symp	1950000	0
113	direct	36	f	D1	presymp	183000000	1
94	direct	4	f	D1	symp	68900	0
110	direct	8	f	D1	symp	138000	0
111	direct	6	m	D1	symp	17100000	0
65	direct	22	f	D1	presymp	28900000	0
114	direct	18	m	D1	presymp	90700	0
115	direct	31	f	D1	presymp	1850000000	1
121	direct	7	f	D1	symp	52600	0
29	direct	9	f	D1	symp	19600	0
28	direct	11	f	D1	symp	18300	0
27	direct	4	m	D1	symp	6530	0
75	direct	6	f	D1	symp	753000	0
83	direct	5	m	D1	symp	14100	0
76	direct	15	f	D1	symp	342	0
64	direct	5	f	D1	asymp	3160	0
7	direct	6	f	D4	symp	112000000	0
138	direct	5	m	D1	presymp	207000000	1
139	direct	16	f	D1	presymp	7320000	1
4	direct	14	f	D4	presymp	30900000	0
5	direct	12	f	D4	presymp	1450000000	1
150	direct	9	f	D1	presymp	32700000	1
151	direct	9	f	D1	presymp	10100000	1
62	direct	5	m	D1	asymp	0	1
63	direct	7	m	D1	presymp	68200000	1
73	direct	10	m	D1	asymp	0	0
74	direct	6	m	D1	symp	4570	0
21	direct	12	m	D1	symp	9460	0
68	direct	8	f	D1	symp	18000000	1
54	direct	5	m	D1	symp	1500000000	1
8	direct	14	f	D4	symp	1620000	0
145	direct	6	m	D1	presymp	846000	1
2	direct	8	m	D1	presymp	1640	0
33	direct	17	m	D2	symp	1160	0
41	direct	8	m	D2	presymp	181000	1
42	direct	15	f	D2	presymp	0	0
43	direct	11	m	D2	presymp	0	1
44	direct	5	m	D2	asymp	250000	1
45	direct	5	f	D2	symp	23100	1
23	direct	12	m	D1	symp	17300	0
49	direct	12	m	D2	asymp	12100000	1
51	direct	25	m	D2	symp	47100	0
50	direct	11	m	D4	asymp	3400	0
34	direct	8	f	D2	presymp	71400	0
53	direct	4	m	D2	symp	23600000	1
60	direct	5	f	D4	symp	145000	0
9	direct	8	m	D4	symp	61300	0
36	direct	7	f	D2	symp	6070	0
56	direct	8	m	D1	symp	768000	0
37	direct	5	m	D2	presymp	443000	0
38	direct	6	f	D2	symp	224000000	1
39	direct	7	f	D2	presymp	12000000	1
3	direct	5	m	D1	symp	205000000	1
69	direct	7	m	D1	symp	146000000	1
70	direct	5	m	D1	symp	4430000	1
79	direct	5	m	D1	symp	98500000	1
11	direct	13	m	D4	symp	764000000	1
24	direct	12	m	D1	symp	14600000	1
25	direct	11	m	D1	symp	48600000	1
26	direct	6	f	D4	symp	37800000	0
10	direct	13	f	D4	symp	12900000	1
78	direct	13	m	D2	symp	2950000	1
40	direct	12	f	D4	symp	582000000	1
77	direct	11	m	D4	presymp	528000	0
12	direct	5	f	D4	symp	2170000	1
71	direct	6	m	D1	symp	1410000000	1
72	direct	8	m	D1	symp	1630	1
84	direct	6	m	D1	symp	1100000	1
46	direct	5	f	D2	presymp	1340000	1
85	direct	6	m	D1	presymp	1020000000	1
86	direct	5	m	D1	symp	93900000	0
146	direct	16	f	D2	symp	297000	0
147	direct	10	f	D2	symp	102000	0
148	direct	7	m	D2	symp	43900000	0
13	direct	15	f	D4	symp	162000	0
14	direct	8	f	D4	symp	1190	0
47	direct	7	m	D4	symp	789	0
15	direct	13	m	D4	symp	56400000	0
142	direct	7	f	D2	symp	1750000	0
118	direct	4	f	D2	symp	5680	0
1	direct	9	m	D1	presymp	39600000	1
16	direct	8	m	D4	symp	172000	0
19	direct	6	m	D4	symp	62500000	1
88	direct	15	f	D4	symp	9600000	0
58	direct	6	m	D4	symp	41100	0
35	direct	14	m	D1	symp	482000000	1
17	direct	10	f	D4	symp	2360	0
18	direct	6	f	D4	symp	270000000	1
20	direct	7	f	D4	symp	37100000	1
159	direct	19	m	D2	symp	121000	0
87	direct	25	f	D1	asymp	244000	0
160	direct	9	f	D2	symp	3470000	0
161	direct	4	m	D4	symp	45300000	0
143	direct	8	f	D4	symp	2080	0
162	direct	12	f	D4	symp	31600000	0
155	direct	13	m	D4	symp	14100000	0
163	direct	8	f	D4	presymp	37100000	0
154	direct	11	m	D4	asymp	893000	0
126	direct	6	f	D2	symp	25800000	0
133	direct	4	f	D2	symp	97100000	0
157	direct	11	m	D2	symp	9350000	0
130	direct	6	m	D2	symp	203000	0
131	direct	8	f	D2	presymp	1000000000	0
127	direct	5	f	D2	presymp	9780	1
134	direct	8	f	D2	symp	571000000	1
135	direct	6	m	D2	symp	41	0
158	direct	21	m	D4	symp	62800000	0
32	direct	6	m	D4	symp	9390000	0
129	direct	23	m	D2	symp	18800000	0
61	direct	12	m	D1	symp	1930000000	1
164	direct	9	f	D2	symp	1830	0
119	direct	10	f	D3	symp	95700000	1
120	direct	12	m	D3	symp	312000000	1
140	direct	16	m	D2	symp	475000	0
141	direct	7	f	D2	presymp	124000	0
153	direct	6	m	D2	symp	2700000000	0
124	direct	4	m	D1	symp	768000	0
30	direct	11	m	D1	symp	137000	0
95	direct	10	m	D1	symp	97800000	1
96	direct	7	m	D1	symp	11300000000	1
97	direct	5	f	D1	symp	34000	0
98	direct	10	m	D1	symp	34200	0
99	direct	4	m	D1	symp	2360000	0
100	direct	11	f	D1	symp	109000000	1
101	direct	14	f	D1	symp	8300000	0
102	direct	6	f	D1	symp	15700	0
103	direct	6	m	D1	symp	400000	0
104	direct	5	f	D1	symp	355000	0
105	direct	5	m	D1	symp	27900000	1
106	direct	6	f	D1	symp	20900000	1
107	direct	6	m	D1	symp	15900000	0
108	direct	6	m	D1	symp	39300000	0
125	direct	6	m	D1	symp	36800000	0
116	direct	6	m	D1	presymp	5570000	1
55	direct	28	f	D1	asymp	5530	0
117	direct	17	f	D1	presymp	17000	0
80	direct	5	f	D1	presymp	493000000	1
136	direct	9	m	D1	symp	206000000	1
93	direct	12	f	D1	symp	1050000000	0
109	direct	12	m	D1	symp	1950000	0
137	direct	10	m	D1	presymp	82800000	1
90	direct	6	m	D1	symp	15200	0
91	direct	4	f	D1	symp	21900	0
92	direct	5	f	D1	symp	18000	0
81	direct	7	f	D1	symp	166000	0
82	direct	7	f	D1	symp	680000	0
112	direct	13	f	D1	symp	814000000	0
144	direct	5	m	D1	symp	1950000	0
113	direct	36	f	D1	presymp	183000000	1
94	direct	4	f	D1	symp	68900	0
110	direct	8	f	D1	symp	138000	0
111	direct	6	m	D1	symp	17100000	0
65	direct	22	f	D1	presymp	28900000	0
114	direct	18	m	D1	presymp	90700	0
115	direct	31	f	D1	presymp	1850000000	1
121	direct	7	f	D1	symp	52600	0
29	direct	9	f	D1	symp	19600	0
28	direct	11	f	D1	symp	18300	0
27	direct	4	m	D1	symp	6530	0
75	direct	6	f	D1	symp	753000	0
83	direct	5	m	D1	symp	14100	0
76	direct	15	f	D1	symp	342	0
64	direct	5	f	D1	asymp	3160	0
7	direct	6	f	D4	symp	112000000	0
138	direct	5	m	D1	presymp	207000000	1
139	direct	16	f	D1	presymp	7320000	1
4	direct	14	f	D4	presymp	30900000	0
150	direct	9	f	D1	presymp	32700000	1
151	direct	9	f	D1	presymp	10100000	1
62	direct	5	m	D1	asymp	0	0
63	direct	7	m	D1	presymp	68200000	1
73	direct	10	m	D1	asymp	0	1
74	direct	6	m	D1	symp	4570	0
21	direct	12	m	D1	symp	9460	0
68	direct	8	f	D1	symp	18000000	1
54	direct	5	m	D1	symp	1500000000	1
8	direct	14	f	D4	symp	1620000	0
145	direct	6	m	D1	presymp	846000	1
2	direct	8	m	D1	presymp	1640	0
33	direct	17	m	D2	symp	1160	0
43	direct	11	m	D2	presymp	0	0
44	direct	5	m	D2	asymp	250000	1
45	direct	5	f	D2	symp	23100	1
23	direct	12	m	D1	symp	17300	0
49	direct	12	m	D2	asymp	12100000	1
51	direct	25	m	D2	symp	47100	0
50	direct	11	m	D4	asymp	3400	0
34	direct	8	f	D2	presymp	71400	0
53	direct	4	m	D2	symp	23600000	1
60	direct	5	f	D4	symp	145000	0
9	direct	8	m	D4	symp	61300	0
36	direct	7	f	D2	symp	6070	0
38	direct	6	f	D2	symp	224000000	1
39	direct	7	f	D2	presymp	12000000	1
3	direct	5	m	D1	symp	205000000	1
69	direct	7	m	D1	symp	146000000	1
70	direct	5	m	D1	symp	4430000	1
79	direct	5	m	D1	symp	98500000	1
11	direct	13	m	D4	symp	764000000	1
24	direct	12	m	D1	symp	14600000	1
25	direct	11	m	D1	symp	48600000	1
26	direct	6	f	D4	symp	37800000	1
10	direct	13	f	D4	symp	12900000	1
78	direct	13	m	D2	symp	2950000	1
40	direct	12	f	D4	symp	582000000	1
77	direct	11	m	D4	presymp	528000	0
12	direct	5	f	D4	symp	2170000	0
71	direct	6	m	D1	symp	1410000000	1
72	direct	8	m	D1	symp	1630	1
84	direct	6	m	D1	symp	1100000	1
46	direct	5	f	D2	presymp	1340000	1
85	direct	6	m	D1	presymp	1020000000	1
86	direct	5	m	D1	symp	93900000	0
146	direct	16	f	D2	symp	297000	0
147	direct	10	f	D2	symp	102000	0
148	direct	7	m	D2	symp	43900000	1
13	direct	15	f	D4	symp	162000	0
14	direct	8	f	D4	symp	1190	0
47	direct	7	m	D4	symp	789	0
15	direct	13	m	D4	symp	56400000	1
142	direct	7	f	D2	symp	1750000	0
118	direct	4	f	D2	symp	5680	0
1	direct	9	m	D1	presymp	39600000	1
16	direct	8	m	D4	symp	172000	0
19	direct	6	m	D4	symp	62500000	0
88	direct	15	f	D4	symp	9600000	0
58	direct	6	m	D4	symp	41100	0
35	direct	14	m	D1	symp	482000000	1
17	direct	10	f	D4	symp	2360	0
18	direct	6	f	D4	symp	270000000	1
20	direct	7	f	D4	symp	37100000	1
159	direct	19	m	D2	symp	121000	0
87	direct	25	f	D1	asymp	244000	0
160	direct	9	f	D2	symp	3470000	0
161	direct	4	m	D4	symp	45300000	0
143	direct	8	f	D4	symp	2080	0
162	direct	12	f	D4	symp	31600000	0
155	direct	13	m	D4	symp	14100000	0
126	direct	6	f	D2	symp	25800000	0
133	direct	4	f	D2	symp	97100000	0
157	direct	11	m	D2	symp	9350000	0
130	direct	6	m	D2	symp	203000	0
131	direct	8	f	D2	presymp	1000000000	1
127	direct	5	f	D2	presymp	9780	1
134	direct	8	f	D2	symp	571000000	1
135	direct	6	m	D2	symp	41	0
158	direct	21	m	D4	symp	62800000	1
32	direct	6	m	D4	symp	9390000	0
129	direct	23	m	D2	symp	18800000	0
61	direct	12	m	D1	symp	1930000000	1
164	direct	9	f	D2	symp	1830	0
119	direct	10	f	D3	symp	95700000	1
120	direct	12	m	D3	symp	312000000	1
140	direct	16	m	D2	symp	475000	0
141	direct	7	f	D2	presymp	124000	1
153	direct	6	m	D2	symp	2700000000	0
124	direct	4	m	D1	symp	768000	0
30	direct	11	m	D1	symp	137000	0
95	direct	10	m	D1	symp	97800000	1
96	direct	7	m	D1	symp	11300000000	1
97	direct	5	f	D1	symp	34000	0
98	direct	10	m	D1	symp	34200	0
99	direct	4	m	D1	symp	2360000	0
100	direct	11	f	D1	symp	109000000	1
101	direct	14	f	D1	symp	8300000	0
102	direct	6	f	D1	symp	15700	0
103	direct	6	m	D1	symp	400000	0
104	direct	5	f	D1	symp	355000	0
105	direct	5	m	D1	symp	27900000	1
106	direct	6	f	D1	symp	20900000	1
107	direct	6	m	D1	symp	15900000	0
108	direct	6	m	D1	symp	39300000	1
116	direct	6	m	D1	presymp	5570000	1
55	direct	28	f	D1	asymp	5530	0
117	direct	17	f	D1	presymp	17000	0
80	direct	5	f	D1	presymp	493000000	1
136	direct	9	m	D1	symp	206000000	1
93	direct	12	f	D1	symp	1050000000	0
109	direct	12	m	D1	symp	1950000	0
137	direct	10	m	D1	presymp	82800000	1
90	direct	6	m	D1	symp	15200	0
91	direct	4	f	D1	symp	21900	0
92	direct	5	f	D1	symp	18000	0
81	direct	7	f	D1	symp	166000	0
82	direct	7	f	D1	symp	680000	0
112	direct	13	f	D1	symp	814000000	0
144	direct	5	m	D1	symp	1950000	0
113	direct	36	f	D1	presymp	183000000	1
94	direct	4	f	D1	symp	68900	0
110	direct	8	f	D1	symp	138000	0
111	direct	6	m	D1	symp	17100000	0
65	direct	22	f	D1	presymp	28900000	0
114	direct	18	m	D1	presymp	90700	0
115	direct	31	f	D1	presymp	1850000000	1
121	direct	7	f	D1	symp	52600	0
28	direct	11	f	D1	symp	18300	0
27	direct	4	m	D1	symp	6530	0
75	direct	6	f	D1	symp	753000	0
83	direct	5	m	D1	symp	14100	0
76	direct	15	f	D1	symp	342	0
64	direct	5	f	D1	asymp	3160	0
138	direct	5	m	D1	presymp	207000000	1
139	direct	16	f	D1	presymp	7320000	1
4	direct	14	f	D4	presymp	30900000	0
150	direct	9	f	D1	presymp	32700000	1
151	direct	9	f	D1	presymp	10100000	1
62	direct	5	m	D1	asymp	0	1
63	direct	7	m	D1	presymp	68200000	1
73	direct	10	m	D1	asymp	0	1
74	direct	6	m	D1	symp	4570	0
21	direct	12	m	D1	symp	9460	0
68	direct	8	f	D1	symp	18000000	1
54	direct	5	m	D1	symp	1500000000	1
8	direct	14	f	D4	symp	1620000	0
145	direct	6	m	D1	presymp	846000	1
2	direct	8	m	D1	presymp	1640	0
33	direct	17	m	D2	symp	1160	0
44	direct	5	m	D2	asymp	250000	1
45	direct	5	f	D2	symp	23100	1
23	direct	12	m	D1	symp	17300	0
49	direct	12	m	D2	asymp	12100000	1
51	direct	25	m	D2	symp	47100	0
50	direct	11	m	D4	asymp	3400	0
53	direct	4	m	D2	symp	23600000	1
60	direct	5	f	D4	symp	145000	0
9	direct	8	m	D4	symp	61300	0
38	direct	6	f	D2	symp	224000000	1
39	direct	7	f	D2	presymp	12000000	1
3	direct	5	m	D1	symp	205000000	1
69	direct	7	m	D1	symp	146000000	1
70	direct	5	m	D1	symp	4430000	1
79	direct	5	m	D1	symp	98500000	1
11	direct	13	m	D4	symp	764000000	1
24	direct	12	m	D1	symp	14600000	1
25	direct	11	m	D1	symp	48600000	1
26	direct	6	f	D4	symp	37800000	0
10	direct	13	f	D4	symp	12900000	1
40	direct	12	f	D4	symp	582000000	1
77	direct	11	m	D4	presymp	528000	0
12	direct	5	f	D4	symp	2170000	0
71	direct	6	m	D1	symp	1410000000	1
72	direct	8	m	D1	symp	1630	1
84	direct	6	m	D1	symp	1100000	1
46	direct	5	f	D2	presymp	1340000	1
85	direct	6	m	D1	presymp	1020000000	1
86	direct	5	m	D1	symp	93900000	0
146	direct	16	f	D2	symp	297000	0
147	direct	10	f	D2	symp	102000	0
148	direct	7	m	D2	symp	43900000	0
13	direct	15	f	D4	symp	162000	0
14	direct	8	f	D4	symp	1190	0
47	direct	7	m	D4	symp	789	0
15	direct	13	m	D4	symp	56400000	0
142	direct	7	f	D2	symp	1750000	0
118	direct	4	f	D2	symp	5680	0
16	direct	8	m	D4	symp	172000	0
19	direct	6	m	D4	symp	62500000	1
88	direct	15	f	D4	symp	9600000	0
58	direct	6	m	D4	symp	41100	0
17	direct	10	f	D4	symp	2360	0
18	direct	6	f	D4	symp	270000000	1
20	direct	7	f	D4	symp	37100000	1
159	direct	19	m	D2	symp	121000	0
87	direct	25	f	D1	asymp	244000	0
160	direct	9	f	D2	symp	3470000	1
161	direct	4	m	D4	symp	45300000	0
143	direct	8	f	D4	symp	2080	0
162	direct	12	f	D4	symp	31600000	0
155	direct	13	m	D4	symp	14100000	0
126	direct	6	f	D2	symp	25800000	0
133	direct	4	f	D2	symp	97100000	0
157	direct	11	m	D2	symp	9350000	0
130	direct	6	m	D2	symp	203000	0
131	direct	8	f	D2	presymp	1000000000	1
127	direct	5	f	D2	presymp	9780	1
134	direct	8	f	D2	symp	571000000	1
135	direct	6	m	D2	symp	41	0
158	direct	21	m	D4	symp	62800000	1
129	direct	23	m	D2	symp	18800000	0
61	direct	12	m	D1	symp	1930000000	1
164	direct	9	f	D2	symp	1830	1
119	direct	10	f	D3	symp	95700000	1
120	direct	12	m	D3	symp	312000000	1
140	direct	16	m	D2	symp	475000	0
153	direct	6	m	D2	symp	2700000000	0
124	direct	4	m	D1	symp	768000	0
30	direct	11	m	D1	symp	137000	0
95	direct	10	m	D1	symp	97800000	1
96	direct	7	m	D1	symp	11300000000	1
97	direct	5	f	D1	symp	34000	0
98	direct	10	m	D1	symp	34200	0
99	direct	4	m	D1	symp	2360000	0
100	direct	11	f	D1	symp	109000000	1
101	direct	14	f	D1	symp	8300000	0
102	direct	6	f	D1	symp	15700	0
103	direct	6	m	D1	symp	400000	0
104	direct	5	f	D1	symp	355000	0
105	direct	5	m	D1	symp	27900000	1
106	direct	6	f	D1	symp	20900000	1
107	direct	6	m	D1	symp	15900000	0
116	direct	6	m	D1	presymp	5570000	1
55	direct	28	f	D1	asymp	5530	0
117	direct	17	f	D1	presymp	17000	0
80	direct	5	f	D1	presymp	493000000	1
136	direct	9	m	D1	symp	206000000	1
93	direct	12	f	D1	symp	1050000000	0
109	direct	12	m	D1	symp	1950000	0
137	direct	10	m	D1	presymp	82800000	1
90	direct	6	m	D1	symp	15200	0
91	direct	4	f	D1	symp	21900	0
92	direct	5	f	D1	symp	18000	0
81	direct	7	f	D1	symp	166000	0
82	direct	7	f	D1	symp	680000	0
144	direct	5	m	D1	symp	1950000	0
113	direct	36	f	D1	presymp	183000000	1
94	direct	4	f	D1	symp	68900	0
110	direct	8	f	D1	symp	138000	0
111	direct	6	m	D1	symp	17100000	0
114	direct	18	m	D1	presymp	90700	0
115	direct	31	f	D1	presymp	1850000000	1
121	direct	7	f	D1	symp	52600	0
28	direct	11	f	D1	symp	18300	0
27	direct	4	m	D1	symp	6530	0
83	direct	5	m	D1	symp	14100	0
76	direct	15	f	D1	symp	342	0
64	direct	5	f	D1	asymp	3160	0
138	direct	5	m	D1	presymp	207000000	1
139	direct	16	f	D1	presymp	7320000	1
4	direct	14	f	D4	presymp	30900000	0
150	direct	9	f	D1	presymp	32700000	1
151	direct	9	f	D1	presymp	10100000	1
62	direct	5	m	D1	asymp	0	1
63	direct	7	m	D1	presymp	68200000	1
73	direct	10	m	D1	asymp	0	0
74	direct	6	m	D1	symp	4570	0
21	direct	12	m	D1	symp	9460	0
68	direct	8	f	D1	symp	18000000	1
8	direct	14	f	D4	symp	1620000	0
145	direct	6	m	D1	presymp	846000	1
2	direct	8	m	D1	presymp	1640	0
33	direct	17	m	D2	symp	1160	0
44	direct	5	m	D2	asymp	250000	1
23	direct	12	m	D1	symp	17300	0
49	direct	12	m	D2	asymp	12100000	1
50	direct	11	m	D4	asymp	3400	0
53	direct	4	m	D2	symp	23600000	1
60	direct	5	f	D4	symp	145000	0
9	direct	8	m	D4	symp	61300	0
38	direct	6	f	D2	symp	224000000	1
39	direct	7	f	D2	presymp	12000000	1
3	direct	5	m	D1	symp	205000000	1
69	direct	7	m	D1	symp	146000000	1
70	direct	5	m	D1	symp	4430000	1
79	direct	5	m	D1	symp	98500000	1
11	direct	13	m	D4	symp	764000000	1
24	direct	12	m	D1	symp	14600000	1
25	direct	11	m	D1	symp	48600000	1
26	direct	6	f	D4	symp	37800000	1
10	direct	13	f	D4	symp	12900000	1
40	direct	12	f	D4	symp	582000000	1
77	direct	11	m	D4	presymp	528000	0
12	direct	5	f	D4	symp	2170000	0
71	direct	6	m	D1	symp	1410000000	1
72	direct	8	m	D1	symp	1630	1
84	direct	6	m	D1	symp	1100000	1
46	direct	5	f	D2	presymp	1340000	1
85	direct	6	m	D1	presymp	1020000000	1
86	direct	5	m	D1	symp	93900000	0
146	direct	16	f	D2	symp	297000	0
147	direct	10	f	D2	symp	102000	0
148	direct	7	m	D2	symp	43900000	1
13	direct	15	f	D4	symp	162000	0
14	direct	8	f	D4	symp	1190	0
47	direct	7	m	D4	symp	789	0
15	direct	13	m	D4	symp	56400000	0
142	direct	7	f	D2	symp	1750000	0
118	direct	4	f	D2	symp	5680	0
16	direct	8	m	D4	symp	172000	0
19	direct	6	m	D4	symp	62500000	1
88	direct	15	f	D4	symp	9600000	0
58	direct	6	m	D4	symp	41100	0
17	direct	10	f	D4	symp	2360	0
18	direct	6	f	D4	symp	270000000	1
20	direct	7	f	D4	symp	37100000	1
159	direct	19	m	D2	symp	121000	0
87	direct	25	f	D1	asymp	244000	1
160	direct	9	f	D2	symp	3470000	1
161	direct	4	m	D4	symp	45300000	0
143	direct	8	f	D4	symp	2080	0
162	direct	12	f	D4	symp	31600000	1
126	direct	6	f	D2	symp	25800000	0
133	direct	4	f	D2	symp	97100000	1
157	direct	11	m	D2	symp	9350000	0
130	direct	6	m	D2	symp	203000	0
131	direct	8	f	D2	presymp	1000000000	1
127	direct	5	f	D2	presymp	9780	1
134	direct	8	f	D2	symp	571000000	1
135	direct	6	m	D2	symp	41	1
158	direct	21	m	D4	symp	62800000	0
61	direct	12	m	D1	symp	1930000000	1
164	direct	9	f	D2	symp	1830	1
119	direct	10	f	D3	symp	95700000	1
120	direct	12	m	D3	symp	312000000	1
153	direct	6	m	D2	symp	2700000000	0
124	direct	4	m	D1	symp	768000	0
30	direct	11	m	D1	symp	137000	0
95	direct	10	m	D1	symp	97800000	1
96	direct	7	m	D1	symp	11300000000	1
97	direct	5	f	D1	symp	34000	0
98	direct	10	m	D1	symp	34200	0
99	direct	4	m	D1	symp	2360000	0
100	direct	11	f	D1	symp	109000000	1
101	direct	14	f	D1	symp	8300000	0
102	direct	6	f	D1	symp	15700	0
103	direct	6	m	D1	symp	400000	0
104	direct	5	f	D1	symp	355000	0
105	direct	5	m	D1	symp	27900000	1
106	direct	6	f	D1	symp	20900000	1
107	direct	6	m	D1	symp	15900000	0
116	direct	6	m	D1	presymp	5570000	1
117	direct	17	f	D1	presymp	17000	0
80	direct	5	f	D1	presymp	493000000	1
136	direct	9	m	D1	symp	206000000	1
93	direct	12	f	D1	symp	1050000000	0
109	direct	12	m	D1	symp	1950000	0
90	direct	6	m	D1	symp	15200	0
91	direct	4	f	D1	symp	21900	0
92	direct	5	f	D1	symp	18000	0
81	direct	7	f	D1	symp	166000	0
82	direct	7	f	D1	symp	680000	0
144	direct	5	m	D1	symp	1950000	0
113	direct	36	f	D1	presymp	183000000	1
94	direct	4	f	D1	symp	68900	0
110	direct	8	f	D1	symp	138000	0
111	direct	6	m	D1	symp	17100000	0
114	direct	18	m	D1	presymp	90700	0
115	direct	31	f	D1	presymp	1850000000	1
28	direct	11	f	D1	symp	18300	0
27	direct	4	m	D1	symp	6530	0
83	direct	5	m	D1	symp	14100	0
64	direct	5	f	D1	asymp	3160	0
138	direct	5	m	D1	presymp	207000000	1
139	direct	16	f	D1	presymp	7320000	1
4	direct	14	f	D4	presymp	30900000	0
150	direct	9	f	D1	presymp	32700000	1
151	direct	9	f	D1	presymp	10100000	1
62	direct	5	m	D1	asymp	0	1
63	direct	7	m	D1	presymp	68200000	1
73	direct	10	m	D1	asymp	0	0
74	direct	6	m	D1	symp	4570	0
68	direct	8	f	D1	symp	18000000	1
8	direct	14	f	D4	symp	1620000	0
145	direct	6	m	D1	presymp	846000	1
2	direct	8	m	D1	presymp	1640	0
33	direct	17	m	D2	symp	1160	0
44	direct	5	m	D2	asymp	250000	1
23	direct	12	m	D1	symp	17300	0
49	direct	12	m	D2	asymp	12100000	1
50	direct	11	m	D4	asymp	3400	0
53	direct	4	m	D2	symp	23600000	1
60	direct	5	f	D4	symp	145000	0
38	direct	6	f	D2	symp	224000000	1
39	direct	7	f	D2	presymp	12000000	1
3	direct	5	m	D1	symp	205000000	1
69	direct	7	m	D1	symp	146000000	1
70	direct	5	m	D1	symp	4430000	1
79	direct	5	m	D1	symp	98500000	1
11	direct	13	m	D4	symp	764000000	1
24	direct	12	m	D1	symp	14600000	1
25	direct	11	m	D1	symp	48600000	1
26	direct	6	f	D4	symp	37800000	1
10	direct	13	f	D4	symp	12900000	1
40	direct	12	f	D4	symp	582000000	1
12	direct	5	f	D4	symp	2170000	1
71	direct	6	m	D1	symp	1410000000	1
72	direct	8	m	D1	symp	1630	1
84	direct	6	m	D1	symp	1100000	1
46	direct	5	f	D2	presymp	1340000	1
85	direct	6	m	D1	presymp	1020000000	1
86	direct	5	m	D1	symp	93900000	1
146	direct	16	f	D2	symp	297000	0
147	direct	10	f	D2	symp	102000	0
148	direct	7	m	D2	symp	43900000	0
13	direct	15	f	D4	symp	162000	0
14	direct	8	f	D4	symp	1190	0
47	direct	7	m	D4	symp	789	0
15	direct	13	m	D4	symp	56400000	0
142	direct	7	f	D2	symp	1750000	0
118	direct	4	f	D2	symp	5680	0
16	direct	8	m	D4	symp	172000	0
19	direct	6	m	D4	symp	62500000	1
88	direct	15	f	D4	symp	9600000	0
58	direct	6	m	D4	symp	41100	0
17	direct	10	f	D4	symp	2360	0
18	direct	6	f	D4	symp	270000000	1
20	direct	7	f	D4	symp	37100000	1
159	direct	19	m	D2	symp	121000	0
87	direct	25	f	D1	asymp	244000	1
160	direct	9	f	D2	symp	3470000	1
161	direct	4	m	D4	symp	45300000	0
143	direct	8	f	D4	symp	2080	0
162	direct	12	f	D4	symp	31600000	0
126	direct	6	f	D2	symp	25800000	1
133	direct	4	f	D2	symp	97100000	0
157	direct	11	m	D2	symp	9350000	0
130	direct	6	m	D2	symp	203000	0
131	direct	8	f	D2	presymp	1000000000	1
134	direct	8	f	D2	symp	571000000	1
135	direct	6	m	D2	symp	41	0
158	direct	21	m	D4	symp	62800000	1
61	direct	12	m	D1	symp	1930000000	1
164	direct	9	f	D2	symp	1830	1
119	direct	10	f	D3	symp	95700000	1
120	direct	12	m	D3	symp	312000000	1
124	direct	4	m	D1	symp	768000	0
30	direct	11	m	D1	symp	137000	0
95	direct	10	m	D1	symp	97800000	1
96	direct	7	m	D1	symp	11300000000	1
97	direct	5	f	D1	symp	34000	0
98	direct	10	m	D1	symp	34200	0
99	direct	4	m	D1	symp	2360000	0
100	direct	11	f	D1	symp	109000000	1
101	direct	14	f	D1	symp	8300000	0
102	direct	6	f	D1	symp	15700	0
103	direct	6	m	D1	symp	400000	0
104	direct	5	f	D1	symp	355000	0
105	direct	5	m	D1	symp	27900000	1
106	direct	6	f	D1	symp	20900000	1
107	direct	6	m	D1	symp	15900000	0
116	direct	6	m	D1	presymp	5570000	1
117	direct	17	f	D1	presymp	17000	0
136	direct	9	m	D1	symp	206000000	1
93	direct	12	f	D1	symp	1050000000	0
90	direct	6	m	D1	symp	15200	0
91	direct	4	f	D1	symp	21900	1
144	direct	5	m	D1	symp	1950000	0
113	direct	36	f	D1	presymp	183000000	1
94	direct	4	f	D1	symp	68900	0
110	direct	8	f	D1	symp	138000	0
111	direct	6	m	D1	symp	17100000	0
114	direct	18	m	D1	presymp	90700	0
115	direct	31	f	D1	presymp	1850000000	1
28	direct	11	f	D1	symp	18300	0
27	direct	4	m	D1	symp	6530	0
64	direct	5	f	D1	asymp	3160	0
138	direct	5	m	D1	presymp	207000000	1
139	direct	16	f	D1	presymp	7320000	1
4	direct	14	f	D4	presymp	30900000	0
150	direct	9	f	D1	presymp	32700000	1
151	direct	9	f	D1	presymp	10100000	1
62	direct	5	m	D1	asymp	0	1
63	direct	7	m	D1	presymp	68200000	1
73	direct	10	m	D1	asymp	0	1
74	direct	6	m	D1	symp	4570	0
68	direct	8	f	D1	symp	18000000	1
8	direct	14	f	D4	symp	1620000	0
145	direct	6	m	D1	presymp	846000	1
2	direct	8	m	D1	presymp	1640	0
44	direct	5	m	D2	asymp	250000	1
49	direct	12	m	D2	asymp	12100000	1
50	direct	11	m	D4	asymp	3400	0
60	direct	5	f	D4	symp	145000	0
38	direct	6	f	D2	symp	224000000	1
39	direct	7	f	D2	presymp	12000000	1
3	direct	5	m	D1	symp	205000000	1
70	direct	5	m	D1	symp	4430000	1
79	direct	5	m	D1	symp	98500000	1
11	direct	13	m	D4	symp	764000000	1
24	direct	12	m	D1	symp	14600000	1
25	direct	11	m	D1	symp	48600000	1
26	direct	6	f	D4	symp	37800000	1
10	direct	13	f	D4	symp	12900000	1
40	direct	12	f	D4	symp	582000000	1
12	direct	5	f	D4	symp	2170000	1
71	direct	6	m	D1	symp	1410000000	1
72	direct	8	m	D1	symp	1630	0
84	direct	6	m	D1	symp	1100000	1
46	direct	5	f	D2	presymp	1340000	1
85	direct	6	m	D1	presymp	1020000000	1
86	direct	5	m	D1	symp	93900000	1
146	direct	16	f	D2	symp	297000	0
147	direct	10	f	D2	symp	102000	0
148	direct	7	m	D2	symp	43900000	0
13	direct	15	f	D4	symp	162000	0
14	direct	8	f	D4	symp	1190	0
47	direct	7	m	D4	symp	789	0
15	direct	13	m	D4	symp	56400000	0
142	direct	7	f	D2	symp	1750000	0
118	direct	4	f	D2	symp	5680	0
16	direct	8	m	D4	symp	172000	0
19	direct	6	m	D4	symp	62500000	0
58	direct	6	m	D4	symp	41100	0
17	direct	10	f	D4	symp	2360	0
18	direct	6	f	D4	symp	270000000	1
20	direct	7	f	D4	symp	37100000	1
159	direct	19	m	D2	symp	121000	0
87	direct	25	f	D1	asymp	244000	1
160	direct	9	f	D2	symp	3470000	1
161	direct	4	m	D4	symp	45300000	1
143	direct	8	f	D4	symp	2080	0
162	direct	12	f	D4	symp	31600000	0
126	direct	6	f	D2	symp	25800000	1
133	direct	4	f	D2	symp	97100000	1
157	direct	11	m	D2	symp	9350000	0
130	direct	6	m	D2	symp	203000	0
131	direct	8	f	D2	presymp	1000000000	0
134	direct	8	f	D2	symp	571000000	1
135	direct	6	m	D2	symp	41	1
158	direct	21	m	D4	symp	62800000	1
61	direct	12	m	D1	symp	1930000000	1
164	direct	9	f	D2	symp	1830	1
119	direct	10	f	D3	symp	95700000	0
120	direct	12	m	D3	symp	312000000	1
124	direct	4	m	D1	symp	768000	0
30	direct	11	m	D1	symp	137000	0
95	direct	10	m	D1	symp	97800000	1
96	direct	7	m	D1	symp	11300000000	1
97	direct	5	f	D1	symp	34000	0
99	direct	4	m	D1	symp	2360000	0
100	direct	11	f	D1	symp	109000000	1
101	direct	14	f	D1	symp	8300000	0
102	direct	6	f	D1	symp	15700	0
103	direct	6	m	D1	symp	400000	0
104	direct	5	f	D1	symp	355000	0
105	direct	5	m	D1	symp	27900000	0
106	direct	6	f	D1	symp	20900000	1
107	direct	6	m	D1	symp	15900000	0
116	direct	6	m	D1	presymp	5570000	1
117	direct	17	f	D1	presymp	17000	0
136	direct	9	m	D1	symp	206000000	1
93	direct	12	f	D1	symp	1050000000	0
90	direct	6	m	D1	symp	15200	0
144	direct	5	m	D1	symp	1950000	0
113	direct	36	f	D1	presymp	183000000	1
94	direct	4	f	D1	symp	68900	0
110	direct	8	f	D1	symp	138000	0
111	direct	6	m	D1	symp	17100000	0
114	direct	18	m	D1	presymp	90700	0
115	direct	31	f	D1	presymp	1850000000	1
28	direct	11	f	D1	symp	18300	0
27	direct	4	m	D1	symp	6530	0
64	direct	5	f	D1	asymp	3160	0
138	direct	5	m	D1	presymp	207000000	1
139	direct	16	f	D1	presymp	7320000	1
4	direct	14	f	D4	presymp	30900000	1
62	direct	5	m	D1	asymp	0	1
63	direct	7	m	D1	presymp	68200000	1
73	direct	10	m	D1	asymp	0	1
74	direct	6	m	D1	symp	4570	0
8	direct	14	f	D4	symp	1620000	0
145	direct	6	m	D1	presymp	846000	1
2	direct	8	m	D1	presymp	1640	0
44	direct	5	m	D2	asymp	250000	1
49	direct	12	m	D2	asymp	12100000	1
38	direct	6	f	D2	symp	224000000	1
39	direct	7	f	D2	presymp	12000000	1
3	direct	5	m	D1	symp	205000000	1
70	direct	5	m	D1	symp	4430000	1
79	direct	5	m	D1	symp	98500000	1
11	direct	13	m	D4	symp	764000000	1
24	direct	12	m	D1	symp	14600000	1
25	direct	11	m	D1	symp	48600000	1
26	direct	6	f	D4	symp	37800000	1
10	direct	13	f	D4	symp	12900000	1
40	direct	12	f	D4	symp	582000000	1
12	direct	5	f	D4	symp	2170000	0
71	direct	6	m	D1	symp	1410000000	1
72	direct	8	m	D1	symp	1630	1
84	direct	6	m	D1	symp	1100000	1
46	direct	5	f	D2	presymp	1340000	0
85	direct	6	m	D1	presymp	1020000000	1
86	direct	5	m	D1	symp	93900000	0
146	direct	16	f	D2	symp	297000	0
147	direct	10	f	D2	symp	102000	0
148	direct	7	m	D2	symp	43900000	0
13	direct	15	f	D4	symp	162000	0
14	direct	8	f	D4	symp	1190	0
47	direct	7	m	D4	symp	789	0
15	direct	13	m	D4	symp	56400000	0
142	direct	7	f	D2	symp	1750000	0
118	direct	4	f	D2	symp	5680	0
16	direct	8	m	D4	symp	172000	0
19	direct	6	m	D4	symp	62500000	1
58	direct	6	m	D4	symp	41100	0
17	direct	10	f	D4	symp	2360	0
20	direct	7	f	D4	symp	37100000	1
159	direct	19	m	D2	symp	121000	0
160	direct	9	f	D2	symp	3470000	0
161	direct	4	m	D4	symp	45300000	0
143	direct	8	f	D4	symp	2080	0
162	direct	12	f	D4	symp	31600000	0
157	direct	11	m	D2	symp	9350000	0
130	direct	6	m	D2	symp	203000	0
131	direct	8	f	D2	presymp	1000000000	1
135	direct	6	m	D2	symp	41	0
158	direct	21	m	D4	symp	62800000	1
61	direct	12	m	D1	symp	1930000000	1
164	direct	9	f	D2	symp	1830	0
119	direct	10	f	D3	symp	95700000	1
120	direct	12	m	D3	symp	312000000	1
124	direct	4	m	D1	symp	768000	0
30	direct	11	m	D1	symp	137000	0
95	direct	10	m	D1	symp	97800000	1
96	direct	7	m	D1	symp	11300000000	1
97	direct	5	f	D1	symp	34000	0
99	direct	4	m	D1	symp	2360000	0
100	direct	11	f	D1	symp	109000000	1
101	direct	14	f	D1	symp	8300000	0
102	direct	6	f	D1	symp	15700	0
103	direct	6	m	D1	symp	400000	0
104	direct	5	f	D1	symp	355000	0
106	direct	6	f	D1	symp	20900000	1
107	direct	6	m	D1	symp	15900000	0
116	direct	6	m	D1	presymp	5570000	1
117	direct	17	f	D1	presymp	17000	0
136	direct	9	m	D1	symp	206000000	1
93	direct	12	f	D1	symp	1050000000	0
90	direct	6	m	D1	symp	15200	0
144	direct	5	m	D1	symp	1950000	0
113	direct	36	f	D1	presymp	183000000	1
94	direct	4	f	D1	symp	68900	0
110	direct	8	f	D1	symp	138000	0
111	direct	6	m	D1	symp	17100000	0
114	direct	18	m	D1	presymp	90700	0
115	direct	31	f	D1	presymp	1850000000	1
28	direct	11	f	D1	symp	18300	0
27	direct	4	m	D1	symp	6530	0
64	direct	5	f	D1	asymp	3160	0
138	direct	5	m	D1	presymp	207000000	1
4	direct	14	f	D4	presymp	30900000	0
62	direct	5	m	D1	asymp	0	1
63	direct	7	m	D1	presymp	68200000	1
73	direct	10	m	D1	asymp	0	0
8	direct	14	f	D4	symp	1620000	0
145	direct	6	m	D1	presymp	846000	1
2	direct	8	m	D1	presymp	1640	0
38	direct	6	f	D2	symp	224000000	1
39	direct	7	f	D2	presymp	12000000	1
3	direct	5	m	D1	symp	205000000	1
70	direct	5	m	D1	symp	4430000	1
79	direct	5	m	D1	symp	98500000	1
11	direct	13	m	D4	symp	764000000	1
24	direct	12	m	D1	symp	14600000	1
25	direct	11	m	D1	symp	48600000	1
10	direct	13	f	D4	symp	12900000	1
40	direct	12	f	D4	symp	582000000	1
12	direct	5	f	D4	symp	2170000	0
71	direct	6	m	D1	symp	1410000000	1
72	direct	8	m	D1	symp	1630	1
84	direct	6	m	D1	symp	1100000	1
46	direct	5	f	D2	presymp	1340000	1
85	direct	6	m	D1	presymp	1020000000	1
86	direct	5	m	D1	symp	93900000	0
146	direct	16	f	D2	symp	297000	0
147	direct	10	f	D2	symp	102000	0
148	direct	7	m	D2	symp	43900000	0
13	direct	15	f	D4	symp	162000	0
14	direct	8	f	D4	symp	1190	0
47	direct	7	m	D4	symp	789	0
142	direct	7	f	D2	symp	1750000	0
118	direct	4	f	D2	symp	5680	0
16	direct	8	m	D4	symp	172000	0
19	direct	6	m	D4	symp	62500000	1
58	direct	6	m	D4	symp	41100	0
17	direct	10	f	D4	symp	2360	0
20	direct	7	f	D4	symp	37100000	1
160	direct	9	f	D2	symp	3470000	1
161	direct	4	m	D4	symp	45300000	1
143	direct	8	f	D4	symp	2080	0
162	direct	12	f	D4	symp	31600000	1
157	direct	11	m	D2	symp	9350000	0
130	direct	6	m	D2	symp	203000	0
131	direct	8	f	D2	presymp	1000000000	1
135	direct	6	m	D2	symp	41	1
61	direct	12	m	D1	symp	1930000000	1
164	direct	9	f	D2	symp	1830	0
119	direct	10	f	D3	symp	95700000	1
120	direct	12	m	D3	symp	312000000	1
124	direct	4	m	D1	symp	768000	0
95	direct	10	m	D1	symp	97800000	1
96	direct	7	m	D1	symp	11300000000	1
100	direct	11	f	D1	symp	109000000	1
101	direct	14	f	D1	symp	8300000	0
102	direct	6	f	D1	symp	15700	0
103	direct	6	m	D1	symp	400000	0
104	direct	5	f	D1	symp	355000	0
106	direct	6	f	D1	symp	20900000	1
107	direct	6	m	D1	symp	15900000	0
116	direct	6	m	D1	presymp	5570000	1
117	direct	17	f	D1	presymp	17000	0
136	direct	9	m	D1	symp	206000000	1
93	direct	12	f	D1	symp	1050000000	0
90	direct	6	m	D1	symp	15200	0
144	direct	5	m	D1	symp	1950000	0
113	direct	36	f	D1	presymp	183000000	1
94	direct	4	f	D1	symp	68900	0
110	direct	8	f	D1	symp	138000	0
111	direct	6	m	D1	symp	17100000	0
114	direct	18	m	D1	presymp	90700	1
115	direct	31	f	D1	presymp	1850000000	1
28	direct	11	f	D1	symp	18300	0
27	direct	4	m	D1	symp	6530	0
138	direct	5	m	D1	presymp	207000000	1
8	direct	14	f	D4	symp	1620000	0
145	direct	6	m	D1	presymp	846000	1
38	direct	6	f	D2	symp	224000000	1
39	direct	7	f	D2	presymp	12000000	1
3	direct	5	m	D1	symp	205000000	1
70	direct	5	m	D1	symp	4430000	1
79	direct	5	m	D1	symp	98500000	1
11	direct	13	m	D4	symp	764000000	1
24	direct	12	m	D1	symp	14600000	1
25	direct	11	m	D1	symp	48600000	1
10	direct	13	f	D4	symp	12900000	1
12	direct	5	f	D4	symp	2170000	0
71	direct	6	m	D1	symp	1410000000	1
72	direct	8	m	D1	symp	1630	1
84	direct	6	m	D1	symp	1100000	1
46	direct	5	f	D2	presymp	1340000	1
86	direct	5	m	D1	symp	93900000	1
146	direct	16	f	D2	symp	297000	0
147	direct	10	f	D2	symp	102000	0
148	direct	7	m	D2	symp	43900000	0
13	direct	15	f	D4	symp	162000	0
14	direct	8	f	D4	symp	1190	0
47	direct	7	m	D4	symp	789	0
142	direct	7	f	D2	symp	1750000	0
118	direct	4	f	D2	symp	5680	0
16	direct	8	m	D4	symp	172000	0
19	direct	6	m	D4	symp	62500000	1
17	direct	10	f	D4	symp	2360	0
20	direct	7	f	D4	symp	37100000	1
161	direct	4	m	D4	symp	45300000	0
143	direct	8	f	D4	symp	2080	0
162	direct	12	f	D4	symp	31600000	0
157	direct	11	m	D2	symp	9350000	0
130	direct	6	m	D2	symp	203000	0
131	direct	8	f	D2	presymp	1000000000	1
135	direct	6	m	D2	symp	41	0
61	direct	12	m	D1	symp	1930000000	1
164	direct	9	f	D2	symp	1830	0
120	direct	12	m	D3	symp	312000000	1
124	direct	4	m	D1	symp	768000	0
95	direct	10	m	D1	symp	97800000	1
96	direct	7	m	D1	symp	11300000000	1
100	direct	11	f	D1	symp	109000000	1
101	direct	14	f	D1	symp	8300000	0
102	direct	6	f	D1	symp	15700	0
103	direct	6	m	D1	symp	400000	0
106	direct	6	f	D1	symp	20900000	1
107	direct	6	m	D1	symp	15900000	0
116	direct	6	m	D1	presymp	5570000	1
117	direct	17	f	D1	presymp	17000	0
136	direct	9	m	D1	symp	206000000	1
93	direct	12	f	D1	symp	1050000000	0
90	direct	6	m	D1	symp	15200	0
144	direct	5	m	D1	symp	1950000	0
113	direct	36	f	D1	presymp	183000000	1
94	direct	4	f	D1	symp	68900	0
110	direct	8	f	D1	symp	138000	0
111	direct	6	m	D1	symp	17100000	0
114	direct	18	m	D1	presymp	90700	0
28	direct	11	f	D1	symp	18300	0
27	direct	4	m	D1	symp	6530	0
138	direct	5	m	D1	presymp	207000000	1
8	direct	14	f	D4	symp	1620000	0
145	direct	6	m	D1	presymp	846000	1
38	direct	6	f	D2	symp	224000000	1
39	direct	7	f	D2	presymp	12000000	1
3	direct	5	m	D1	symp	205000000	1
70	direct	5	m	D1	symp	4430000	1
79	direct	5	m	D1	symp	98500000	1
11	direct	13	m	D4	symp	764000000	1
24	direct	12	m	D1	symp	14600000	1
25	direct	11	m	D1	symp	48600000	1
10	direct	13	f	D4	symp	12900000	1
12	direct	5	f	D4	symp	2170000	0
71	direct	6	m	D1	symp	1410000000	1
72	direct	8	m	D1	symp	1630	1
84	direct	6	m	D1	symp	1100000	1
46	direct	5	f	D2	presymp	1340000	1
86	direct	5	m	D1	symp	93900000	1
146	direct	16	f	D2	symp	297000	0
147	direct	10	f	D2	symp	102000	0
148	direct	7	m	D2	symp	43900000	0
13	direct	15	f	D4	symp	162000	0
47	direct	7	m	D4	symp	789	0
142	direct	7	f	D2	symp	1750000	0
118	direct	4	f	D2	symp	5680	0
16	direct	8	m	D4	symp	172000	0
19	direct	6	m	D4	symp	62500000	1
17	direct	10	f	D4	symp	2360	0
20	direct	7	f	D4	symp	37100000	1
161	direct	4	m	D4	symp	45300000	0
143	direct	8	f	D4	symp	2080	0
162	direct	12	f	D4	symp	31600000	0
157	direct	11	m	D2	symp	9350000	0
130	direct	6	m	D2	symp	203000	0
131	direct	8	f	D2	presymp	1000000000	1
135	direct	6	m	D2	symp	41	0
61	direct	12	m	D1	symp	1930000000	1
164	direct	9	f	D2	symp	1830	0
120	direct	12	m	D3	symp	312000000	1
95	direct	10	m	D1	symp	97800000	1
96	direct	7	m	D1	symp	11300000000	1
100	direct	11	f	D1	symp	109000000	1
101	direct	14	f	D1	symp	8300000	0
102	direct	6	f	D1	symp	15700	0
103	direct	6	m	D1	symp	400000	0
106	direct	6	f	D1	symp	20900000	1
116	direct	6	m	D1	presymp	5570000	1
117	direct	17	f	D1	presymp	17000	0
136	direct	9	m	D1	symp	206000000	1
93	direct	12	f	D1	symp	1050000000	0
144	direct	5	m	D1	symp	1950000	0
113	direct	36	f	D1	presymp	183000000	1
94	direct	4	f	D1	symp	68900	0
110	direct	8	f	D1	symp	138000	0
111	direct	6	m	D1	symp	17100000	0
114	direct	18	m	D1	presymp	90700	0
28	direct	11	f	D1	symp	18300	0
27	direct	4	m	D1	symp	6530	0
138	direct	5	m	D1	presymp	207000000	1
8	direct	14	f	D4	symp	1620000	0
145	direct	6	m	D1	presymp	846000	1
38	direct	6	f	D2	symp	224000000	1
39	direct	7	f	D2	presymp	12000000	1
3	direct	5	m	D1	symp	205000000	1
70	direct	5	m	D1	symp	4430000	1
79	direct	5	m	D1	symp	98500000	1
11	direct	13	m	D4	symp	764000000	1
24	direct	12	m	D1	symp	14600000	1
25	direct	11	m	D1	symp	48600000	1
10	direct	13	f	D4	symp	12900000	1
12	direct	5	f	D4	symp	2170000	0
71	direct	6	m	D1	symp	1410000000	1
72	direct	8	m	D1	symp	1630	1
84	direct	6	m	D1	symp	1100000	0
46	direct	5	f	D2	presymp	1340000	0
86	direct	5	m	D1	symp	93900000	1
146	direct	16	f	D2	symp	297000	0
147	direct	10	f	D2	symp	102000	0
148	direct	7	m	D2	symp	43900000	0
47	direct	7	m	D4	symp	789	0
142	direct	7	f	D2	symp	1750000	0
118	direct	4	f	D2	symp	5680	0
16	direct	8	m	D4	symp	172000	0
19	direct	6	m	D4	symp	62500000	1
17	direct	10	f	D4	symp	2360	0
20	direct	7	f	D4	symp	37100000	1
161	direct	4	m	D4	symp	45300000	0
143	direct	8	f	D4	symp	2080	0
162	direct	12	f	D4	symp	31600000	0
157	direct	11	m	D2	symp	9350000	0
130	direct	6	m	D2	symp	203000	0
135	direct	6	m	D2	symp	41	0
61	direct	12	m	D1	symp	1930000000	1
164	direct	9	f	D2	symp	1830	0
120	direct	12	m	D3	symp	312000000	1
95	direct	10	m	D1	symp	97800000	1
96	direct	7	m	D1	symp	11300000000	1
100	direct	11	f	D1	symp	109000000	1
101	direct	14	f	D1	symp	8300000	0
102	direct	6	f	D1	symp	15700	0
103	direct	6	m	D1	symp	400000	0
106	direct	6	f	D1	symp	20900000	1
117	direct	17	f	D1	presymp	17000	0
136	direct	9	m	D1	symp	206000000	1
93	direct	12	f	D1	symp	1050000000	0
113	direct	36	f	D1	presymp	183000000	1
94	direct	4	f	D1	symp	68900	0
110	direct	8	f	D1	symp	138000	0
111	direct	6	m	D1	symp	17100000	0
114	direct	18	m	D1	presymp	90700	0
28	direct	11	f	D1	symp	18300	0
138	direct	5	m	D1	presymp	207000000	1
8	direct	14	f	D4	symp	1620000	0
145	direct	6	m	D1	presymp	846000	1
39	direct	7	f	D2	presymp	12000000	1
79	direct	5	m	D1	symp	98500000	1
11	direct	13	m	D4	symp	764000000	1
24	direct	12	m	D1	symp	14600000	1
25	direct	11	m	D1	symp	48600000	1
10	direct	13	f	D4	symp	12900000	1
12	direct	5	f	D4	symp	2170000	0
71	direct	6	m	D1	symp	1410000000	1
84	direct	6	m	D1	symp	1100000	1
46	direct	5	f	D2	presymp	1340000	0
86	direct	5	m	D1	symp	93900000	1
146	direct	16	f	D2	symp	297000	0
147	direct	10	f	D2	symp	102000	0
148	direct	7	m	D2	symp	43900000	1
142	direct	7	f	D2	symp	1750000	0
118	direct	4	f	D2	symp	5680	0
16	direct	8	m	D4	symp	172000	0
19	direct	6	m	D4	symp	62500000	1
17	direct	10	f	D4	symp	2360	0
20	direct	7	f	D4	symp	37100000	1
161	direct	4	m	D4	symp	45300000	0
143	direct	8	f	D4	symp	2080	0
162	direct	12	f	D4	symp	31600000	0
157	direct	11	m	D2	symp	9350000	0
130	direct	6	m	D2	symp	203000	0
135	direct	6	m	D2	symp	41	0
164	direct	9	f	D2	symp	1830	0
120	direct	12	m	D3	symp	312000000	1
95	direct	10	m	D1	symp	97800000	1
100	direct	11	f	D1	symp	109000000	0
101	direct	14	f	D1	symp	8300000	0
102	direct	6	f	D1	symp	15700	0
103	direct	6	m	D1	symp	400000	0
106	direct	6	f	D1	symp	20900000	1
117	direct	17	f	D1	presymp	17000	0
136	direct	9	m	D1	symp	206000000	1
93	direct	12	f	D1	symp	1050000000	0
113	direct	36	f	D1	presymp	183000000	1
94	direct	4	f	D1	symp	68900	0
110	direct	8	f	D1	symp	138000	0
111	direct	6	m	D1	symp	17100000	0
114	direct	18	m	D1	presymp	90700	0
28	direct	11	f	D1	symp	18300	0
138	direct	5	m	D1	presymp	207000000	1
145	direct	6	m	D1	presymp	846000	1
39	direct	7	f	D2	presymp	12000000	1
79	direct	5	m	D1	symp	98500000	1
11	direct	13	m	D4	symp	764000000	1
24	direct	12	m	D1	symp	14600000	1
25	direct	11	m	D1	symp	48600000	1
10	direct	13	f	D4	symp	12900000	1
12	direct	5	f	D4	symp	2170000	0
84	direct	6	m	D1	symp	1100000	0
46	direct	5	f	D2	presymp	1340000	0
86	direct	5	m	D1	symp	93900000	0
146	direct	16	f	D2	symp	297000	0
147	direct	10	f	D2	symp	102000	0
148	direct	7	m	D2	symp	43900000	1
142	direct	7	f	D2	symp	1750000	0
16	direct	8	m	D4	symp	172000	0
19	direct	6	m	D4	symp	62500000	1
20	direct	7	f	D4	symp	37100000	1
161	direct	4	m	D4	symp	45300000	0
162	direct	12	f	D4	symp	31600000	0
157	direct	11	m	D2	symp	9350000	0
130	direct	6	m	D2	symp	203000	0
135	direct	6	m	D2	symp	41	0
164	direct	9	f	D2	symp	1830	0
120	direct	12	m	D3	symp	312000000	1
95	direct	10	m	D1	symp	97800000	1
100	direct	11	f	D1	symp	109000000	0
101	direct	14	f	D1	symp	8300000	0
102	direct	6	f	D1	symp	15700	0
103	direct	6	m	D1	symp	400000	0
117	direct	17	f	D1	presymp	17000	0
136	direct	9	m	D1	symp	206000000	1
93	direct	12	f	D1	symp	1050000000	0
113	direct	36	f	D1	presymp	183000000	1
94	direct	4	f	D1	symp	68900	0
110	direct	8	f	D1	symp	138000	0
111	direct	6	m	D1	symp	17100000	0
114	direct	18	m	D1	presymp	90700	0
138	direct	5	m	D1	presymp	207000000	1
39	direct	7	f	D2	presymp	12000000	1
11	direct	13	m	D4	symp	764000000	1
24	direct	12	m	D1	symp	14600000	1
25	direct	11	m	D1	symp	48600000	1
10	direct	13	f	D4	symp	12900000	1
12	direct	5	f	D4	symp	2170000	0
84	direct	6	m	D1	symp	1100000	1
46	direct	5	f	D2	presymp	1340000	0
86	direct	5	m	D1	symp	93900000	0
146	direct	16	f	D2	symp	297000	0
147	direct	10	f	D2	symp	102000	0
148	direct	7	m	D2	symp	43900000	1
142	direct	7	f	D2	symp	1750000	0
19	direct	6	m	D4	symp	62500000	1
162	direct	12	f	D4	symp	31600000	0
164	direct	9	f	D2	symp	1830	1
120	direct	12	m	D3	symp	312000000	1
95	direct	10	m	D1	symp	97800000	1
100	direct	11	f	D1	symp	109000000	1
101	direct	14	f	D1	symp	8300000	0
102	direct	6	f	D1	symp	15700	0
117	direct	17	f	D1	presymp	17000	0
136	direct	9	m	D1	symp	206000000	1
93	direct	12	f	D1	symp	1050000000	0
113	direct	36	f	D1	presymp	183000000	1
94	direct	4	f	D1	symp	68900	0
110	direct	8	f	D1	symp	138000	0
111	direct	6	m	D1	symp	17100000	0
114	direct	18	m	D1	presymp	90700	0
138	direct	5	m	D1	presymp	207000000	1
11	direct	13	m	D4	symp	764000000	1
24	direct	12	m	D1	symp	14600000	1
25	direct	11	m	D1	symp	48600000	1
10	direct	13	f	D4	symp	12900000	1
12	direct	5	f	D4	symp	2170000	0
84	direct	6	m	D1	symp	1100000	1
46	direct	5	f	D2	presymp	1340000	0
86	direct	5	m	D1	symp	93900000	0
146	direct	16	f	D2	symp	297000	0
142	direct	7	f	D2	symp	1750000	0
19	direct	6	m	D4	symp	62500000	1
164	direct	9	f	D2	symp	1830	0
120	direct	12	m	D3	symp	312000000	1
95	direct	10	m	D1	symp	97800000	1
101	direct	14	f	D1	symp	8300000	0
102	direct	6	f	D1	symp	15700	0
136	direct	9	m	D1	symp	206000000	1
93	direct	12	f	D1	symp	1050000000	0
113	direct	36	f	D1	presymp	183000000	1
94	direct	4	f	D1	symp	68900	0
110	direct	8	f	D1	symp	138000	0
111	direct	6	m	D1	symp	17100000	0
114	direct	18	m	D1	presymp	90700	0
138	direct	5	m	D1	presymp	207000000	1
11	direct	13	m	D4	symp	764000000	1
24	direct	12	m	D1	symp	14600000	1
25	direct	11	m	D1	symp	48600000	1
10	direct	13	f	D4	symp	12900000	1
12	direct	5	f	D4	symp	2170000	0
84	direct	6	m	D1	symp	1100000	0
46	direct	5	f	D2	presymp	1340000	1
86	direct	5	m	D1	symp	93900000	1
146	direct	16	f	D2	symp	297000	0
142	direct	7	f	D2	symp	1750000	0
19	direct	6	m	D4	symp	62500000	0
164	direct	9	f	D2	symp	1830	0
120	direct	12	m	D3	symp	312000000	1
95	direct	10	m	D1	symp	97800000	1
101	direct	14	f	D1	symp	8300000	0
102	direct	6	f	D1	symp	15700	0
136	direct	9	m	D1	symp	206000000	1
93	direct	12	f	D1	symp	1050000000	0
113	direct	36	f	D1	presymp	183000000	1
94	direct	4	f	D1	symp	68900	0
110	direct	8	f	D1	symp	138000	0
111	direct	6	m	D1	symp	17100000	0
114	direct	18	m	D1	presymp	90700	1
11	direct	13	m	D4	symp	764000000	1
24	direct	12	m	D1	symp	14600000	1
25	direct	11	m	D1	symp	48600000	1
10	direct	13	f	D4	symp	12900000	1
12	direct	5	f	D4	symp	2170000	0
84	direct	6	m	D1	symp	1100000	1
46	direct	5	f	D2	presymp	1340000	0
86	direct	5	m	D1	symp	93900000	0
146	direct	16	f	D2	symp	297000	0
142	direct	7	f	D2	symp	1750000	1
19	direct	6	m	D4	symp	62500000	1
164	direct	9	f	D2	symp	1830	0
120	direct	12	m	D3	symp	312000000	1
95	direct	10	m	D1	symp	97800000	1
101	direct	14	f	D1	symp	8300000	0
102	direct	6	f	D1	symp	15700	0
136	direct	9	m	D1	symp	206000000	1
93	direct	12	f	D1	symp	1050000000	0
113	direct	36	f	D1	presymp	183000000	1
94	direct	4	f	D1	symp	68900	0
110	direct	8	f	D1	symp	138000	0
111	direct	6	m	D1	symp	17100000	0
114	direct	18	m	D1	presymp	90700	1
11	direct	13	m	D4	symp	764000000	1
24	direct	12	m	D1	symp	14600000	1
25	direct	11	m	D1	symp	48600000	1
12	direct	5	f	D4	symp	2170000	0
84	direct	6	m	D1	symp	1100000	1
46	direct	5	f	D2	presymp	1340000	1
146	direct	16	f	D2	symp	297000	0
19	direct	6	m	D4	symp	62500000	1
164	direct	9	f	D2	symp	1830	0
120	direct	12	m	D3	symp	312000000	1
95	direct	10	m	D1	symp	97800000	1
101	direct	14	f	D1	symp	8300000	0
102	direct	6	f	D1	symp	15700	0
113	direct	36	f	D1	presymp	183000000	1
111	direct	6	m	D1	symp	17100000	0
114	direct	18	m	D1	presymp	90700	0
11	direct	13	m	D4	symp	764000000	1
25	direct	11	m	D1	symp	48600000	1
12	direct	5	f	D4	symp	2170000	0
84	direct	6	m	D1	symp	1100000	1
46	direct	5	f	D2	presymp	1340000	1
19	direct	6	m	D4	symp	62500000	1
164	direct	9	f	D2	symp	1830	1
120	direct	12	m	D3	symp	312000000	1
95	direct	10	m	D1	symp	97800000	1
102	direct	6	f	D1	symp	15700	0
113	direct	36	f	D1	presymp	183000000	1
114	direct	18	m	D1	presymp	90700	0
11	direct	13	m	D4	symp	764000000	1
84	direct	6	m	D1	symp	1100000	1
46	direct	5	f	D2	presymp	1340000	0
19	direct	6	m	D4	symp	62500000	1
164	direct	9	f	D2	symp	1830	0
120	direct	12	m	D3	symp	312000000	1
95	direct	10	m	D1	symp	97800000	1
102	direct	6	f	D1	symp	15700	0
114	direct	18	m	D1	presymp	90700	0
11	direct	13	m	D4	symp	764000000	1
84	direct	6	m	D1	symp	1100000	1
46	direct	5	f	D2	presymp	1340000	1
19	direct	6	m	D4	symp	62500000	1
164	direct	9	f	D2	symp	1830	0
120	direct	12	m	D3	symp	312000000	1
95	direct	10	m	D1	symp	97800000	1
102	direct	6	f	D1	symp	15700	0
11	direct	13	m	D4	symp	764000000	1
84	direct	6	m	D1	symp	1100000	1
46	direct	5	f	D2	presymp	1340000	1
19	direct	6	m	D4	symp	62500000	1
164	direct	9	f	D2	symp	1830	0
120	direct	12	m	D3	symp	312000000	1
95	direct	10	m	D1	symp	97800000	1
102	direct	6	f	D1	symp	15700	0
11	direct	13	m	D4	symp	764000000	1
84	direct	6	m	D1	symp	1100000	1
46	direct	5	f	D2	presymp	1340000	0
19	direct	6	m	D4	symp	62500000	1
164	direct	9	f	D2	symp	1830	0
120	direct	12	m	D3	symp	312000000	1
102	direct	6	f	D1	symp	15700	0
84	direct	6	m	D1	symp	1100000	0
46	direct	5	f	D2	presymp	1340000	0
19	direct	6	m	D4	symp	62500000	1
164	direct	9	f	D2	symp	1830	0
120	direct	12	m	D3	symp	312000000	1
102	direct	6	f	D1	symp	15700	0
164	direct	9	f	D2	symp	1830	0
120	direct	12	m	D3	symp	312000000	1
102	direct	6	f	D1	symp	15700	0
164	direct	9	f	D2	symp	1830	0
102	direct	6	f	D1	symp	15700	0
